# Supplementary material for: Combined ALK and MDM2 inhibition increases antitumor activity and overcomes resistance in human ALK mutant neuroblastoma cell lines and xenograft models
Source: eLife. 2017 Apr 20;6:e17137. doi: 10.7554/eLife.17137 (PMC5435462; doi:10.7554/eLife.17137)
Supplement: Figure 3—source data 1. — DOI: http://dx.doi.org/10.7554/eLife.17137.006 [file elife-17137-fig3-data1.xlsx]

## Sheet: NB-1
Figure 3A - NB-1
Assay Cage	Maus ID	Location	Assoc. Vehicle #	TRP-0574-NB1-XEF				Days post treatment
				Comp ID	Concentration	schedule	Route	0	2	6	7	13	16	20	27	31	37	42	48	56	59	70	72	83	86	90
1	981020009672656		1	Vehicle	[conc: 0/0 mg/kg/mg/kg]	[reg: qd/qd]	[rte: p.o./p.o.]	304.415	686.751	1709.91	2247.88
1	981020009679268		1	Vehicle	[conc: 0/0 mg/kg/mg/kg]	[reg: qd/qd]	[rte: p.o./p.o.]	245.792	696.652	1319.07	2176.92
1	981020009682483		1	Vehicle	[conc: 0/0 mg/kg/mg/kg]	[reg: qd/qd]	[rte: p.o./p.o.]	288.65	431.425	1261.42	1624.95
1	981020009678374		1	Vehicle	[conc: 0/0 mg/kg/mg/kg]	[reg: qd/qd]	[rte: p.o./p.o.]	290.904	662.821	1600.41	1962.36
1	981020009685602		1	Vehicle	[conc: 0/0 mg/kg/mg/kg]	[reg: qd/qd]	[rte: p.o./p.o.]	142.168	233.933	787.166	898.159
2	981020009632721		2	CGM097	[conc: 50 mg/kg]	[reg: qd]	[rte: p.o.]	164.837	219.875	735.463	850.434
2	981020009655257		2	CGM097	[conc: 50 mg/kg]	[reg: qd]	[rte: p.o.]	335.377	706.056	1713.53	2375.18
2	981020009677738		2	CGM097	[conc: 50 mg/kg]	[reg: qd]	[rte: p.o.]	303.406	635.219	1695.1	2373.11
2	981020009680366		2	CGM097	[conc: 50 mg/kg]	[reg: qd]	[rte: p.o.]	235.204	514.646	1731.29	2065.18
2	981020009636252		2	CGM097	[conc: 50 mg/kg]	[reg: qd]	[rte: p.o.]	236.333	496.645	1894.88	2213.99
3	981020009685062		3	Ceritinib	[conc: 50 mg/kg]	[reg: qd]	[rte: p.o.]	366.192	305.987	189.976	170.325	261.74	358.861	956.414	1835.23
3	981020009689794		3	Ceritinib	[conc: 50 mg/kg]	[reg: qd]	[rte: p.o.]	220.864	166.436	152.215	135.42	156.949	203.876	355.389	691.853
3	981020009657135		3	Ceritinib	[conc: 50 mg/kg]	[reg: qd]	[rte: p.o.]	267.872	167.918	118.747	94.7812	132.701	265.251	543.931	688.508
3	981020009676303		3	Ceritinib	[conc: 50 mg/kg]	[reg: qd]	[rte: p.o.]	216.944	149.321	90.4866	98.6606	161.513	168.948	456.294	1134.14
3	981020009641008		3	Ceritinib	[conc: 50 mg/kg]	[reg: qd]	[rte: p.o.]	206.383	116.729	121.804	117.244	198.029	268.311	751.537	1076.01
4	981020009636649		6	CGM097 + Ceritinb	[conc: 50/50 mg/kg/mg/kg]	[reg: qd/qd]	[rte: p.o./p.o.]	321.536	156.634	28.1012	37.167	18.3629	16.0393	0.206479	0.114982	0.143793	0.118847	0.0919522	0.118847	0.118847	0.118847	0.118847	0.118847	0.1	0.118847	0.1
4	981020009680758		6	CGM097 + Ceritinb	[conc: 50/50 mg/kg/mg/kg]	[reg: qd/qd]	[rte: p.o./p.o.]	171.568	104.223	28.1562	22.9836	0.321555	0.157479	0.19532	0.107536	0.143793	0.118847	0.0919522	0.118847	0.118847	0.118847	0.118847	0.118847	26.7	74.6	177.1
4	981020009660990		6	CGM097 + Ceritinb	[conc: 50/50 mg/kg/mg/kg]	[reg: qd/qd]	[rte: p.o./p.o.]	319.17	210.494	41.9693	38.1777	12.9201	2.0441	0.588977	0.143793	0.143793	0.118847	0.0919522	0.118847	0.118847	0.118847	0.118847	0.118847	0.1	0.118847	0.1
4	981020009677117		6	CGM097 + Ceritinb	[conc: 50/50 mg/kg/mg/kg]	[reg: qd/qd]	[rte: p.o./p.o.]	251.179	162.615	62.0773	40.839	35.292	34.9189	1.52033	0.118847	0.143793	0.118847	0.0919522	0.118847	0.118847	0.118847	0.118847	0.118847	0.1	0.118847	0.1
4	981020009670917		6	CGM097 + Ceritinb	[conc: 50/50 mg/kg/mg/kg]	[reg: qd/qd]	[rte: p.o./p.o.]	209.698	116.782	8.62555	1.04739	0.314033	0.164636	0.16218	0.107536	0.143793	0.118847	0.0969667	0.118847	0.118847	0.118847	0.118847	0.118847	26.1	121.1	547

## Sheet: SH-SY5Y
Figure 3A - SH-SY5Y						Days of treamtment
Mouse ID	Groups	Comp ID	Concentration	schedule	Route	0	3	6	9	13	16	20	24	27	34	41	48	55	62	69	76	83	90	100	105	111
981020009651320	1	Vehicle	[conc: 0 mg/kg]	[reg: qd]	[rte: p.o.]	216.212	370.783	420.219	621.348	1111.99	1439.35
981020009632439	1	Vehicle	[conc: 0 mg/kg]	[reg: qd]	[rte: p.o.]	143.08	194.935	212.705	241.184	260.32	347.774
981020009652849	1	Vehicle	[conc: 0 mg/kg]	[reg: qd]	[rte: p.o.]	149.962	289.114	455.095	650.252	1205.59	1574.95
981020009687929	1	Vehicle	[conc: 0 mg/kg]	[reg: qd]	[rte: p.o.]	185.087	240.559	427.455	760.998	1242.14	1759.36
981020009668238	2	CGM097	[conc: 50 mg/kg]	[reg: qd]	[rte: p.o.]	148.637	148.715	75.3139	174.026	292.724	197.671	455.29	614.885
981020009682416	2	CGM098	[conc: 50 mg/kg]	[reg: qd]	[rte: p.o.]	208.014	248.923	224.936	343.42	424.353	581.079	892.98	1111.75
981020009678984	2	CGM099	[conc: 50 mg/kg]	[reg: qd]	[rte: p.o.]	187.548	292.194	302.986	541.301	822.985	1140.8	1299.19	1806.62
981020009678043	2	CGM100	[conc: 50 mg/kg]	[reg: qd]	[rte: p.o.]	135.327	177.486	176.879	197.436	227.896	344.506	342.366	493.772
981020009690392	3	Ceritinib	[conc: 50 mg/kg]	[reg: qd]	[rte: p.o.]	152.475	193.9	245.882	177.025	298.247	325.483	473.48	413.027	532.985	676.281	451.659
981020009664318	3	Ceritinib	[conc: 50 mg/kg]	[reg: qd]	[rte: p.o.]	150.769	123.427	170.777	152.747	162.092	197.194	237.994	288.061	258.856	248.06	241.707
981020009692223	3	Ceritinib	[conc: 50 mg/kg]	[reg: qd]	[rte: p.o.]	173.507	176.432	239.966	194.369	217.156	210.772	253.497	197.757	204.403	183.484	111.616
981020007371338	3	Ceritinib	[conc: 50 mg/kg]	[reg: qd]	[rte: p.o.]	225.739	243.738	242.119	214.507	181.67	208.876	237.231	367.585	428.008	480.456	433.549
981020009669697	4	CGM097 + Ceritinib	[conc: 50/50 mg/kg/mg/kg]	[reg: qd/qd]	[rte: p.o./p.o.]	212.801	208.649	127.718	58.3162	0.369121	0.310339	0.344791	0.333038	0.299387	0.187402	0.0543615	0.0543615	0.1	0.1	0.1	0.1	0.1	0.0310593	0.0969667	0.0616008	0.0387924
981020009658016	4	CGM097 + Ceritinib	[conc: 50/50 mg/kg/mg/kg]	[reg: qd/qd]	[rte: p.o./p.o.]	170.362	148.01	77.6752	49.4107	0.369121	0.310339	0.344791	0.333038	0.299387	0.187402	0.0543615	0.0543615	0.1	0.1	0.1	0.1	0.1	0.0310593	58.7559	165.411	126.392
981020007381081	4	CGM097 + Ceritinib	[conc: 50/50 mg/kg/mg/kg]	[reg: qd/qd]	[rte: p.o./p.o.]	132.701	90.895	68.81	4.99664	0.369121	0.310339	0.344791	0.333038	0.299387	0.187402	0.0543615	0.0543615	0.1	0.1	0.1	0.1	0.1	0.0310593	34.9076	58.0596	153.36
981020007369437	4	CGM097 + Ceritinib	[conc: 50/50 mg/kg/mg/kg]	[reg: qd/qd]	[rte: p.o./p.o.]	186.287	171.037	88.4611	24.4356	0.369121	0.310339	0.344791	0.333038	0.299387	0.187402	0.0543615	0.0543615	0.1	0.1	0.1	0.1	0.1	0.0310593	51.8812	596.919	537.296

## Sheet: NB-1643
Figure 3A - NB-1643					Days of treamtment
Groups	Comp ID	Concentration	schedule	Route	0	2	5	8	12	15	20	23	28	34	40	47	54	57	68	71
1	Vehicle	[conc: 0 mg/kg]	[reg: qd]	[rte: p.o.]	305.88	346.45	381.97	451.74	646.82	913.42
1	Vehicle	[conc: 0 mg/kg]	[reg: qd]	[rte: p.o.]	368.65	504.03	644.92	1088.26	1515.03	1521.29
1	Vehicle	[conc: 0 mg/kg]	[reg: qd]	[rte: p.o.]	367.23	469.58	700.17	1006.53	1270.53	1683.52
1	Vehicle	[conc: 0 mg/kg]	[reg: qd]	[rte: p.o.]	230.76	372.93	627.94	864.72	1192.38	1670.27
1	Vehicle	[conc: 0 mg/kg]	[reg: qd]	[rte: p.o.]	362.56	512.76	714.16	1091.47	1310.75	1340.54
2	CGM097	[conc: 50 mg/kg]	[reg: qd]	[rte: p.o.]	210.68	510.59	568.38	865.4	869.95	1235.17	1355.89
2	CGM098	[conc: 50 mg/kg]	[reg: qd]	[rte: p.o.]	337.27	709.01	802.27	934.94	1359.59	1177.56	1791.37
2	CGM099	[conc: 50 mg/kg]	[reg: qd]	[rte: p.o.]	335.2	488.56	496.21	668.3	949.82	1391.27	1711.9
2	CGM099	[conc: 50 mg/kg]	[reg: qd]	[rte: p.o.]	360.56	328.31	572.97	649.16	892.04	1261.62	1369.36
2	CGM100	[conc: 50 mg/kg]	[reg: qd]	[rte: p.o.]	343.7	384.26	580.31	541.73	810.76	1161.97	1151.57
3	Ceritinib	[conc: 50 mg/kg]	[reg: qd]	[rte: p.o.]	355.97	345.58	395.82	314.9	319.61	500.09	282.77	430.49	506.14	581	963.3	1058.38
3	Ceritinib	[conc: 50 mg/kg]	[reg: qd]	[rte: p.o.]	215.13	189.24	212.74	268.09	290.66	315	330.92	344.33	408.05	503.59	774.22	1075.21
3	Ceritinib	[conc: 50 mg/kg]	[reg: qd]	[rte: p.o.]	364.84	271.58	282.04	327.7	383.74	548.96	483.38	668.56	889.31	952.54	950.05	1199.66
3	Ceritinib	[conc: 50 mg/kg]	[reg: qd]	[rte: p.o.]	333.2	372.7	291.32	239.69	428.15	570.49	436.41	473.6	613.71	724.98	831.65	1155.93
3	Ceritinib	[conc: 50 mg/kg]	[reg: qd]	[rte: p.o.]	328.2	314.76	395.42	339.99	236.03	411.84	264.94	418.99	574.82	957.57	1187.7	1203.64
4	CGM097 + Ceritinib	[conc: 50/50 mg/kg/mg/kg]	[reg: qd/qd]	[rte: p.o./p.o.]	276.24	214.63	132.72	113.06	127.65	105.83	103.25	135	81.19	45.69	0	0	0	0	0	0
4	CGM097 + Ceritinib	[conc: 50/50 mg/kg/mg/kg]	[reg: qd/qd]	[rte: p.o./p.o.]	272.13	118.76	94.84	73.05	0	0	0	0	0	0	0	0	0	0	0	0
4	CGM097 + Ceritinib	[conc: 50/50 mg/kg/mg/kg]	[reg: qd/qd]	[rte: p.o./p.o.]	286.11	286.04	243.88	158.7	263.14	348.21	68.97	62.69	43.89	0	0	0	0	0	0	0
4	CGM097 + Ceritinib	[conc: 50/50 mg/kg/mg/kg]	[reg: qd/qd]	[rte: p.o./p.o.]	391.75	279.13	178.1	72.26	102.33	110.26	0	0	0	0	0	0	0	0	0	0
4	CGM097 + Ceritinib	[conc: 50/50 mg/kg/mg/kg]	[reg: qd/qd]	[rte: p.o./p.o.]	381.64	412.28	222.31	150.4	262.72	169.63	128.89	114.49	110.2	73.6	0	0	0	0	0	0

## Sheet: IMR-32
Figure 3A - IMR-32						Days of treamtment
Mouse ID	Groups	Comp ID	Concentration	schedule	Route	0	3	6	8
985114000007490	1	Vehicle	[conc: 0 mg/kg]	[reg: qd]	[rte: p.o.]	287.8	674.35	1205.32	1635.24
985114000007509	1	Vehicle	[conc: 0 mg/kg]	[reg: qd]	[rte: p.o.]	259.84	375.94	882.94	1191.94
985114000006584	1	Vehicle	[conc: 0 mg/kg]	[reg: qd]	[rte: p.o.]	287.01	489.41	850.68	986.93
985114000007376	1	Vehicle	[conc: 0 mg/kg]	[reg: qd]	[rte: p.o.]	180.17	432.79	754.05	886.39
985114000008547	1	Vehicle	[conc: 0 mg/kg]	[reg: qd]	[rte: p.o.]	392.07	597.59	1050.37	1159.88
985114000007527	2	CGM097	[conc: 50 mg/kg]	[reg: qd]	[rte: p.o.]	331.85	708.35	793.18	1227.33
985114000007571	2	CGM097	[conc: 50 mg/kg]	[reg: qd]	[rte: p.o.]	315.79	842.58	972.45	1206.12
985114000008349	2	CGM097	[conc: 50 mg/kg]	[reg: qd]	[rte: p.o.]	315.56	567.31	757.65	1005.09
985114000007405	2	CGM097	[conc: 50 mg/kg]	[reg: qd]	[rte: p.o.]	144.86	236.74	315.93	659.34
985114000008501	2	CGM097	[conc: 50 mg/kg]	[reg: qd]	[rte: p.o.]	289.93	433.64	626.84	777.93
985114000008468	3	Ceritinib	[conc: 50 mg/kg]	[reg: qd]	[rte: p.o.]	322.27	807.6	972.57	1175.14
985114000007601	3	Ceritinib	[conc: 50 mg/kg]	[reg: qd]	[rte: p.o.]	254.64	548.03	638.54	886.91
985114000007504	3	Ceritinib	[conc: 50 mg/kg]	[reg: qd]	[rte: p.o.]	238.56	568.99	774.64	920.66
985114000008495	3	Ceritinib	[conc: 50 mg/kg]	[reg: qd]	[rte: p.o.]	401.97	721.99	1021.08	1078.87
985114000007662	3	Ceritinib	[conc: 50 mg/kg]	[reg: qd]	[rte: p.o.]	211.35	482.93	452.63	723.02
985114000007582	4	CGM097 + Ceritinib	[conc: 50/50 mg/kg/mg/kg]	[reg: qd/qd]	[rte: p.o./p.o.]	160.8	353.56	664.72	795.45
985114000007391	4	CGM097 + Ceritinib	[conc: 50/50 mg/kg/mg/kg]	[reg: qd/qd]	[rte: p.o./p.o.]	336.99	837.63	903.23	1090.6
985114000008473	4	CGM097 + Ceritinib	[conc: 50/50 mg/kg/mg/kg]	[reg: qd/qd]	[rte: p.o./p.o.]	277.65	685.94	986.51	1049.73
985114000007514	4	CGM097 + Ceritinib	[conc: 50/50 mg/kg/mg/kg]	[reg: qd/qd]	[rte: p.o./p.o.]	304.36	486.49	517.63	858.6
985114000008497	4	CGM097 + Ceritinib	[conc: 50/50 mg/kg/mg/kg]	[reg: qd/qd]	[rte: p.o./p.o.]	351.69	894.31	1035.3	1299.18

## Sheet: Command
Header:	TRP-574-NB-1: tumor volume final analysis 9/27/2013

## Sheet: DataDef
Data definitions
Max cages	20
Max timpts	17
Rules
Never change values in the cage sheets or in the summary sheet
Input
The first cage must be the control cage
The data must be pasted into sheet "RawData", Row 1 must contain the following headers:
Assay Cage	Maus ID	Location	Comp ID	Concentration	Schedule	Repeat	Applic	11_02_00	15_02_00	18_02_00	22_02_00	25_02_00	29_02_00	etc.
