# Supplementary material for: Combined ALK and MDM2 inhibition increases antitumor activity and overcomes resistance in human ALK mutant neuroblastoma cell lines and xenograft models
Source: eLife. 2017 Apr 20;6:e17137. doi: 10.7554/eLife.17137 (PMC5435462; doi:10.7554/eLife.17137)
Supplement: Figure 5—source data 1. — DOI: http://dx.doi.org/10.7554/eLife.17137.009 [file elife-17137-fig5-data1.xlsx]

## Sheet: Fig 5H source data
Figure 5H - NB-1							Days of treatment
Groups	Mouse ID	Comp ID	Concentration	Schedule	Repeat	Route	0	3	7	10	12	17	20	24	32	40	49	55	60
1	981020009682315	Vehicle	[conc: 0 mg/kg]	Vehicle (a)	[reg: qd]	[rte: p.o.]	202.445	364.794	717.499	1219.2
1	981020009657460	Vehicle	[conc: 0 mg/kg]	Vehicle (a)	[reg: qd]	[rte: p.o.]	187.362	475.884	1143.16	2032.35
1	981020009635630	Vehicle	[conc: 0 mg/kg]	Vehicle (a)	[reg: qd]	[rte: p.o.]	278.949	509.17	795.598	1022.07
1	981020009671549	Vehicle	[conc: 0 mg/kg]	Vehicle (a)	[reg: qd]	[rte: p.o.]	240.772	527.283	927.841	1252.31
2	981020009684695	CGM097	[conc: 50 mg/kg]	CGM097 (b)	[reg: qd]	[rte: p.o.]	171.308	190.161	712.54	1219.52
2	981020009644319	CGM097	[conc: 50 mg/kg]	CGM097 (b)	[reg: qd]	[rte: p.o.]	245.159	389.809	1354.37	2180.94
2	981020009687571	CGM097	[conc: 50 mg/kg]	CGM097 (b)	[reg: qd]	[rte: p.o.]	250.267	477.926	1381.21	2012.17
2	981020009680352	CGM097	[conc: 50 mg/kg]	CGM097 (b)	[reg: qd]	[rte: p.o.]	189.934	430.66	1165.97	1977.75
2	981020009661316	CGM097	[conc: 50 mg/kg]	CGM097 (b)	[reg: qd]	[rte: p.o.]	247.098	651.778	1371.08	1991.72
3	981020009683412	Ceritinib	[conc: 50 mg/kg]	Ceritinib (c)	[reg: qd]	[rte: p.o.]	204.794	172.106	272.132	455.143	815.153
3	981020009690299	Ceritinib	[conc: 50 mg/kg]	Ceritinib (c)	[reg: qd]	[rte: p.o.]	203.402	185.674	200.114	269.984	392.913
3	981020009647179	Ceritinib	[conc: 50 mg/kg]	Ceritinib (c)	[reg: qd]	[rte: p.o.]	230.387	169.923	132.559	186.284	313.411
3	981020009667678	Ceritinib	[conc: 50 mg/kg]	Ceritinib (c)	[reg: qd]	[rte: p.o.]	203.492	200.238	137.817	257.088	404.213
3	981020009627724	Ceritinib	[conc: 50 mg/kg]	Ceritinib (c)	[reg: qd]	[rte: p.o.]	292.874	194.889	365.487	567.421	947.159
4	981020009657930	Ceritinib	[conc: 50 mg/kg]	Ceritinib®CGM097 ® Ceritinib + CGM097 (d)	[reg: qd]	[rte: p.o.]	229.9	178.369	210.094	392.144	804.994	1296.2	1216.62	439.666	137.823	65.6924	65.906	88.8777	202.132
4	981020009659392	Ceritinib	[conc: 50 mg/kg]	Ceritinib®CGM097 ® Ceritinib + CGM097 (d)	[reg: qd]	[rte: p.o.]	207.691	174.673	151.419	149.687	225.341	711.721	459.583	103.628	40.7523	0.539464	0.44892	0.195432	0.137258
4	981020009674102	Ceritinib	[conc: 50 mg/kg]	Ceritinib®CGM097 ® Ceritinib + CGM097 (d)	[reg: qd]	[rte: p.o.]	221.36	152.486	122.064	169.166	461.838	703.763	686.559	221.452	44.115	1.02265	0.44892	0.195432	0.137258
4	981020009626248	Ceritinib	[conc: 50 mg/kg]	Ceritinib®CGM097 ® Ceritinib + CGM097 (d)	[reg: qd]	[rte: p.o.]	301.15	222.107	157.196	168.329	309.308	350.589	217.13	64.5399	26.4572	1.03902	0.44892	0.0779518	0.137258
4	981020009685046	Ceritinib	[conc: 50 mg/kg]	Ceritinib®CGM097 ® Ceritinib + CGM097 (d)	[reg: qd]	[rte: p.o.]	210.661	167.314	149.295	192.061	408.735	923.002	821.8	332.255	49.1398	0.539464	0.44892	0.0779518	0.137258
5	981020009662032	Ceritinib	[conc: 50 mg/kg]	Ceritinib®Ceritinib + CGM097 (e)	[reg: qd]	[rte: p.o.]	230.196	192.96	146.459	242.008	349.51	131.755	110.163	93.1677	73.4552	0.659583	0.268082	0.229847	0.212175
5	981020009637238	Ceritinib	[conc: 50 mg/kg]	Ceritinib®Ceritinib + CGM097 (e)	[reg: qd]	[rte: p.o.]	212.358	165.611	151.212	309.392	406.368	227.858	195.504	153.59	0.678075	0.860289	0.44892	0.463246	0.212175
5	981020009642058	Ceritinib	[conc: 50 mg/kg]	Ceritinib®Ceritinib + CGM097 (e)	[reg: qd]	[rte: p.o.]	299.891	281.945	259.524	412.867	516.334	355.265	288.667	219.64	119.111	77.7308	113.325	175.87	491.497
5	981020009682469	Ceritinib	[conc: 50 mg/kg]	Ceritinib®Ceritinib + CGM097 (e)	[reg: qd]	[rte: p.o.]	211.017	188.877	150.751	113.324	285.631	64.6971	0.882346	0.57215	0.606131	0.678075	0.268082	0.229847	0.212175
5	981020009685131	Ceritinib	[conc: 50 mg/kg]	Ceritinib®Ceritinib + CGM097 (e)	[reg: qd]	[rte: p.o.]	209.88	180.81	303.583	622.875	938.909	593.081	473.654	424.967	607.924	569.162	858.204	1292.53
6	981020009652342	Ceritinib	[conc: 50 mg/kg]	Ceritinib®CGM097 (f)	[reg: qd]	[rte: p.o.]	173.984	118.107	71.7091	78.4468	81.4464	135.791
6	981020009664518	Ceritinib	[conc: 50 mg/kg]	Ceritinib®CGM097 (f)	[reg: qd]	[rte: p.o.]	201.224	127.216	99.3749	87.0349	182.526	294.144
6	981020009663271	Ceritinib	[conc: 50 mg/kg]	Ceritinib®CGM097 (f)	[reg: qd]	[rte: p.o.]	230.621	179.151	178.461	275.593	594.657	1270.06
6	981020009640798	Ceritinib	[conc: 50 mg/kg]	Ceritinib®CGM097 (f)	[reg: qd]	[rte: p.o.]	272.961	203.346	184.293	267.758	460.127	1742.14
6	981020009662211	Ceritinib	[conc: 50 mg/kg]	Ceritinib®CGM097 (f)	[reg: qd]	[rte: p.o.]	234.338	181.049	178.036	295.778	530.041	1598.12
7	981020009657732	Ceritinib 50 mg/kg + CGM097 50mg/kg	[conc: 50/50 mg/kg/mg/kg]	Ceritinib + CGM097 (g)	[reg: qd/qd]	[rte: p.o./p.o.]	174.245	114.953	108.421	128.787	92.0693	85.7373	73.2789	64.6453	57.7948	47.0821	50.4913	59.3713	93.1318
7	981020009650149	Ceritinib 50 mg/kg + CGM097 50mg/kg	[conc: 50/50 mg/kg/mg/kg]	Ceritinib + CGM097 (g)	[reg: qd/qd]	[rte: p.o./p.o.]	244.579	184.875	55.4404	26.5166	0.974347	0.838602	0.716089	0.44892	0.817283	0.539464	0.42116	0.229847	0.23904
7	981020009661578	Ceritinib 50 mg/kg + CGM097 50mg/kg	[conc: 50/50 mg/kg/mg/kg]	Ceritinib + CGM097 (g)	[reg: qd/qd]	[rte: p.o./p.o.]	243.139	160.222	97.8983	77.1647	0.974347	0.838602	0.716089	0.453646	0.817283	0.539464	0.268082	0.195432	0.23904
7	981020009647948	Ceritinib 50 mg/kg + CGM097 50mg/kg	[conc: 50/50 mg/kg/mg/kg]	Ceritinib + CGM097 (g)	[reg: qd/qd]	[rte: p.o./p.o.]	188.988	86.2301	46.4729	28.0678	0.974347	0.838602	0.716089	0.453646	0.817283	0.838602	0.42116	0.195432	0.23904
7	981020009659628	Ceritinib 50 mg/kg + CGM097 50mg/kg	[conc: 50/50 mg/kg/mg/kg]	Ceritinib + CGM097 (g)	[reg: qd/qd]	[rte: p.o./p.o.]	257.077	148.507	90.6848	82.4512	0.974347	0.838602	0.716089	0.44892	0.606131	0.539464	0.42116	0.229847	112.139

## Sheet: Command
Header:	TRP-711-NB1: tumor volume final analysis 10/30/2014

## Sheet: DataDef
Data definitions
Max cages	20
Max timpts	17
Rules
Never change values in the cage sheets or in the summary sheet
Input
The first cage must be the control cage
The data must be pasted into sheet "RawData", Row 1 must contain the following headers:
Assay Cage	Maus ID	Location	Comp ID	Concentration	Schedule	Repeat	Applic	11_02_00	15_02_00	18_02_00	22_02_00	25_02_00	29_02_00	etc.
