# Supplementary material for: Combined ALK and MDM2 inhibition increases antitumor activity and overcomes resistance in human ALK mutant neuroblastoma cell lines and xenograft models
Source: eLife. 2017 Apr 20;6:e17137. doi: 10.7554/eLife.17137 (PMC5435462; doi:10.7554/eLife.17137)
Supplement: Supplementary file 1. — NB-1 tumors that progressed under treatment with 50 mg/kg ceritinib and NB-1 tumors treated with vehicle as shown in Figure 3A were analyzed by RNA-Seq. Gene expression was quantified by FPKM. FPKM, Fragments Per Kilobase of transcript per Million fragments mapped. DOI: http://dx.doi.org/10.7554/eLife.17137.012 [file elife-17137-supp1.xlsx]

## Sheet: NB-1_fpkm
ID	vehicle-treated 1	vehicle-treated 2	relapsed 1	relapsed 2
A1BG	5.41402	5.8903	27.2741	34.4372
A1BG-AS1	3.72202	3.11888	1.65355	1.36807
A1CF	0	0.00311566	0	0
A2M	0	0.0312672	0.00859852	0
A2M-AS1	0	0.0133047	0.018294	0
A2ML1	0.215343	0.337894	0	0.0103289
A2MP1	0	0	0	0.0325863
A3GALT2	0	0	0	0
A4GALT	0	0	0	0
A4GNT	0	0	0	0
AA06	0	0	0	0
AAAS	44.5067	41.1045	29.7199	19.5953
AACS	7.12499	6.62377	4.02378	3.73567
AACSP1	0.0121125	0.0133904	0	0
AADAC	0	0.0181179	0	0
AADACL2	0	0	0	0
AADACL3	0	0	0	0
AADACL4	0	0	0	0
AADAT	9.18208	8.61654	8.16177	6.87508
AAED1	3.35183	3.20664	4.57244	4.05738
AAGAB	20.4153	18.4342	15.3314	19.3239
AAK1	2.85917	2.44245	0.216366	0.193242
AAMDC	18.957	18.9363	17.0673	11.4147
AAMP	31.0179	30.9148	20.9528	12.8999
AANAT	0	0	0.038995	0.267011
AAR2	24.8154	24.5639	21.1426	18.038
AARD	0	0	0	0.0219127
AARS	44.1639	37.4854	12.2037	15.0155
AARS2	12.5603	11.7131	1.07092	0.793854
AARSD1	19.5993	19.4798	13.0536	6.38583
AASDH	4.07261	3.58711	4.03347	3.52786
AASDHPPT	13.3761	13.3433	17.704	13.091
AASS	4.53693	4.05905	0.80413	0.506617
AATF	25.7427	24.6396	4.44751	2.70535
AATK	0.509403	0.79753	0.0234772	0.0535852
AATK-AS1	0	0.018451	0.0253703	0
ABAT	3.15798	2.54578	2.09148	0.988206
ABCA1	0.0200499	0.0360183	0.00380965	0
ABCA10	0	0	0	0
ABCA11P	3.9178	4.31469	4.62372	5.30421
ABCA12	0.0144618	0.0143874	0	0
ABCA13	0	0	0	0
ABCA17P	0.094271	0.118112	0.0382129	0.0280345
ABCA2	9.72207	9.98128	0.711719	0.566641
ABCA3	41.7837	35.6082	4.21655	2.3282
ABCA4	0.186848	0.127114	0.0273098	0.0373998
ABCA5	0.0709915	0.0640298	0.0440235	0.0191392
ABCA6	0	0	0	0
ABCA7	1.53645	1.47236	0.0880219	0.0344407
ABCA8	0.00920296	0.0152608	0	0
ABCA9	0	0	0	0
ABCB1	0.0055811	0	0.00848365	0
ABCB10	7.32906	7.24226	4.90646	5.89529
ABCB11	0	0	0	0
ABCB4	0.0197997	0.0678486	0.0103658	0.0101397
ABCB5	0	0	0	0
ABCB6	18.358	21.6253	7.80823	7.37856
ABCB7	8.20735	8.4746	7.30326	5.39652
ABCB8	4.70046	4.63921	1.76595	1.20774
ABCB9	1.83812	2.12995	1.71544	1.07752
ABCC1	24.3874	23.1164	3.20656	1.87243
ABCC10	3.07684	2.6987	0.731544	0.682064
ABCC11	0.0117211	0.0129577	0.00890846	0.00871413
ABCC12	0	0	0	0
ABCC13	0	0	0	0
ABCC2	0.182383	0.1613	0.0950518	0.0697338
ABCC3	0.086614	0.0506921	0.0542126	0.0909086
ABCC4	15.1891	14.5103	6.93222	7.42595
ABCC5	9.38128	9.38255	13.5295	13.5502
ABCC5-AS1	0	0	0	0
ABCC6	0.0761778	0.0518982	0	0
ABCC6P1	0	0	0	0
ABCC6P2	0.149124	0.0412143	0	0
ABCC8	0.676782	0.444233	0.0482229	0.0235855
ABCC9	0	0	0	0
ABCD1	3.08174	4.201	0.40402	0.224307
ABCD2	0.0936321	0.0653749	0.0599272	0.0366375
ABCD3	30.658	29.2273	23.9144	27.3242
ABCD4	4.34703	5.16841	3.01904	2.56773
ABCE1	25.5376	25.5605	42.4157	43.7026
ABCF1	29.1829	27.7586	5.15678	4.55752
ABCF2	30.6115	27.8457	15.22	14.1465
ABCF3	17.6527	18.5422	5.10222	4.19968
ABCG1	0.820782	0.903915	0.269378	0.197578
ABCG2	0.00612337	0	0	0.0273147
ABCG4	0.593858	0.51421	0.110475	0.0972588
ABCG5	0.00960601	0	0.0292036	0.0142833
ABCG8	0.00987635	0	0.0150127	0
ABHD1	0.127416	0.160981	0.0553373	0.0270651
ABHD10	15.0108	15.1614	29.1745	31.1411
ABHD11	4.91207	5.06784	3.61772	6.12335
ABHD12	40.2432	38.4391	16.3988	14.4858
ABHD12B	0	0	0	0
ABHD13	4.80043	5.00504	8.55716	8.23764
ABHD14A	20.7356	21.1764	26.4031	26.8288
ABHD14A-ACY1	2.10712	3.08926	4.99405	4.61153
ABHD14B	7.88632	7.89532	10.2793	4.87895
ABHD15	2.4163	2.06413	0.0119252	0.0349951
ABHD16A	22.2354	21.5847	19.6928	13.1614
ABHD16B	1.80805	1.50729	0.540661	0.308506
ABHD17A	21.5849	20.6232	29.433	24.6438
ABHD17B	15.4584	15.5143	17.9077	14.057
ABHD17C	3.15623	3.23029	1.66139	1.21057
ABHD2	9.94292	8.3479	0.439402	0.504988
ABHD3	2.06585	1.7058	3.21777	4.81618
ABHD4	3.76606	3.86185	0.988661	0.327565
ABHD5	3.3632	3.22337	4.23782	5.49062
ABHD6	5.71945	5.67841	9.37944	9.7636
ABHD8	12.7321	10.5948	11.1412	9.17547
ABI1	9.76976	10.2256	23.8342	20.5725
ABI2	25.4634	24.0996	7.74864	7.02398
ABI3	0	0	0	0
ABI3BP	0.0529587	0.0325255	0.0178891	0.0437471
ABL1	54.1235	50.9155	7.94261	3.98558
ABL2	9.04121	8.01755	0.966617	0.589997
ABLIM1	23.991	21.736	2.0344	1.03263
ABLIM2	1.03542	0.91293	1.28203	0.722806
ABLIM3	0	0	0	0
ABO	0.316712	0.405409	0	0
ABR	16.3648	16.8856	5.44571	2.78378
ABRA	0.00955718	0.0211309	0	0
ABRACL	37.2536	36.6385	78.3606	114.583
ABT1	11.561	11.5078	22.789	24.125
ABTB1	0.561288	0.710525	0.527278	0.336706
ABTB2	0.461668	0.587524	0.155042	0.0798209
ACAA1	11.2627	12.8733	17.7075	12.942
ACAA2	32.295	31.3089	20.4182	21.794
ACACA	13.6383	11.2824	1.22813	1.15231
ACACB	1.40012	1.48176	0.20331	0.131173
ACAD10	5.49718	6.26049	2.21411	1.54539
ACAD11	1.43458	1.7676	0.915228	0.812623
ACAD8	4.31699	3.88669	3.74459	3.34284
ACAD9	9.22558	8.86471	4.10815	4.06479
ACADL	0.0317114	0.035057	0.0321357	0
ACADM	15.1051	14.889	14.0157	18.2801
ACADS	1.9222	1.66964	0.939176	0.857444
ACADSB	2.29933	2.43906	4.38408	3.95248
ACADVL	24.3439	27.8506	10.3985	9.04043
ACAN	0	0	0.00931681	0
ACAP1	0.0104946	0.0464071	0.0159525	0.0312091
ACAP2	6.65537	7.33316	4.50867	4.74874
ACAP3	8.97655	7.88003	2.51186	1.8428
ACAT1	13.9249	14.685	16.2923	14.1396
ACAT2	52.4086	46.8036	36.7059	58.505
ACBD3	19.1589	19.5233	7.13763	6.09273
ACBD4	0.837372	0.815079	0.99218	0.538707
ACBD5	17.8885	18.135	11.6277	11.8688
ACBD6	72.8536	74.1296	42.3361	29.2068
ACBD7	3.67081	3.19466	3.20546	2.77553
ACCS	1.05382	1.18006	0.809985	0.720985
ACCSL	0.0433854	0	0	0
ACD	20.5018	19.3702	15.4353	11.5762
ACE	0.572692	0.491621	0.0490305	0.0599514
ACE2	0.060041	0.0580784	0.0114083	0.0111594
ACER1	0	0	0	0.0359707
ACER2	0.544498	0.683562	0.336681	0.562617
ACER3	4.94971	4.18518	1.72366	1.73958
ACHE	0.374171	0.720332	0.0181529	0.0532706
ACIN1	56.6028	50.0433	11.7527	6.06493
ACKR2	0	0	0.0135165	0
ACKR3	0	0.0138558	0	0
ACKR4	0.0112227	0.034847	0	0
ACLY	100.612	89.9617	28.3188	31.4628
ACMSD	0	0	0	0.0313089
ACN9	13.4481	12.3066	49.6173	68.1886
ACO1	12.0123	12.743	2.80183	2.8198
ACO2	42.697	47.309	19.3561	14.7438
ACOT1	1.69121	1.83333	2.87026	2.63675
ACOT11	2.18658	3.19627	0.339591	0.172244
ACOT12	0	0	0.0201151	0
ACOT13	4.993	4.71534	6.98749	5.33733
ACOT2	6.83663	6.14798	7.92179	6.99231
ACOT4	0.0806387	0.160463	0	0.0239805
ACOT6	0	0	0	0
ACOT7	67.5142	65.6783	54.4794	49.0217
ACOT8	9.22652	10.8868	16.3336	15.4802
ACOT9	25.8954	25.0287	35.3697	48.1201
ACOX1	6.30838	6.06047	3.97047	3.36021
ACOX2	0.421766	0.504067	0.0346547	0.0508482
ACOX3	2.8612	2.85164	1.49603	1.20305
ACOXL	0.0554582	0.0122618	0	0.0164923
ACP1	70.0908	70.0385	98.8802	92.8824
ACP2	10.0853	9.14061	3.33125	1.92374
ACP5	0.160708	0.117852	0	0
ACP6	9.75371	10.5413	13.0117	7.66272
ACPL2	11.5252	9.61353	3.91578	4.74192
ACPP	0.0652318	0.0634313	0	0
ACPT	0.0195401	0	0	0
ACR	0	0	0	0
ACRBP	0.29307	0.416557	0.593981	0.290512
ACRC	0.347848	0.357078	1.34706	0.935919
ACRV1	0.117264	0.0518493	0	0.0666148
ACSBG1	0.0354079	0.0195717	0.0403669	0
ACSBG2	0.0485259	0.0751036	0.0295051	0.0288615
ACSF2	1.48119	1.85838	0.446727	0.24471
ACSF3	2.35155	2.46281	1.22076	1.03886
ACSL1	10.2377	8.20536	7.5181	6.1507
ACSL3	17.6819	17.2839	2.7468	2.11528
ACSL4	6.93783	7.25539	10.3838	11.1485
ACSL5	0.0487402	0.00898039	0.0493923	0.0120787
ACSL6	0.0487367	0.0227357	0.018757	0.0239494
ACSM1	0	0	0	0
ACSM2A	0	0	0	0
ACSM2B	0	0	0	0
ACSM3	0.0790565	0.134792	0.0601069	0.0249371
ACSM4	0	0.0166938	0	0
ACSM5	0	0	0	0
ACSS1	2.0804	1.94753	0.514549	0.457069
ACSS2	5.69615	6.83384	1.07409	0.87984
ACSS3	0	0	0	0
ACTA1	0.229334	0.0780088	0.160894	0.0524614
ACTA2	0.602033	1.09887	0.159346	0.167941
ACTB	2002.75	1884.16	815.391	692.27
ACTBL2	0	0	0	0.0280144
ACTC1	0	0.0157581	0	0
ACTG1	1946.35	2288.66	2320.23	1458.22
ACTG1P4	0.106184	0.117387	0.10088	0.0592075
ACTG2	0.0437659	0.0483832	0.0901778	0
ACTL10	0.103828	0.0286955	0.0591848	0
ACTL6A	71.2485	66.1303	103.272	157.028
ACTL6B	3.69621	3.38296	25.7144	27.5819
ACTL7A	0.0367348	0.0203051	0.0279197	0
ACTL7B	0.0187068	0	0.0853068	0.0278153
ACTL8	0.0282864	0.0938118	0.365476	0.168237
ACTL9	0	0	0	0
ACTN1	16.4233	16.573	4.37084	3.25627
ACTN1-AS1	0	0.0485764	0	0
ACTN2	0.81808	0.915046	0.154321	0.150955
ACTN3	0	0.0197666	0	0
ACTN4	29.7444	26.5636	3.87313	2.38355
ACTR10	18.6109	18.9889	46.9912	48.5475
ACTR1A	64.9263	61.8305	35.1906	29.6961
ACTR1B	14.1977	16.0692	18.5692	14.1431
ACTR2	83.1128	78.5991	32.6668	24.5007
ACTR3	22.4579	22.4691	20.1064	19.3991
ACTR3B	13.7002	12.0496	13.1754	9.9361
ACTR3BP2	0	0	0	0
ACTR3BP5	0	0	0	0
ACTR3C	0.410936	0.45429	0.406533	0.491877
ACTR5	5.95635	5.4462	5.50344	5.7465
ACTR6	10.8746	12.3689	19.4645	19.4771
ACTR8	10.4252	9.96109	5.40363	4.67088
ACTRT1	0	0	0	0
ACTRT2	0	0	0	0
ACTRT3	0.210248	0.261483	0.299617	0.254004
ACVR1	3.74179	4.54506	2.00794	1.59429
ACVR1B	17.4838	16.3427	8.13354	4.4261
ACVR1C	0.00619432	0	0	0
ACVR2A	1.39956	1.38934	1.98887	1.48964
ACVR2B	7.13034	7.03319	1.42826	1.09084
ACVR2B-AS1	0.596053	0.843902	1.11268	0.171036
ACVRL1	0.00634475	0.0280565	0.0289334	0.0188682
ACY1	11.1668	11.0864	16.3531	14.8067
ACY3	0	0	0	0
ACYP1	10.2853	10.9953	10.698	12.3894
ACYP2	1.40002	1.42867	7.30113	6.21311
ADA	1.95857	2.9819	0.57454	1.58384
ADAD1	0	0	0	0
ADAD2	0	0	0	0
ADAL	3.32179	3.09877	4.37658	3.19877
ADAM10	17.3526	16.012	6.13327	4.95306
ADAM11	0.185355	0.17186	0	0
ADAM12	0.0216131	0.00477866	0	0
ADAM15	51.4808	53.342	9.45655	8.83627
ADAM17	12.1194	11.6209	7.19552	6.65304
ADAM18	0	0	0	0
ADAM19	0.0725637	0.0534795	0.0367672	0.00599421
ADAM1A	3.21592	3.14537	1.78913	1.25401
ADAM2	0	0	0	0
ADAM20	0.0377084	0.031265	0	0
ADAM20P1	0.0520167	0.0670886	0.0263563	0
ADAM21	0	0.0436896	0	0
ADAM21P1	0	0	0	0
ADAM22	5.22244	5.08035	2.09629	2.2439
ADAM23	7.30631	6.38504	1.67105	1.28253
ADAM28	0.00817406	0.0452169	0	0
ADAM29	0	0	0	0
ADAM30	0	0	0	0
ADAM32	0.0193036	0.0213401	0.0293428	0
ADAM33	0	0	0	0
ADAM3A	0	0	0	0
ADAM5	0	0	0	0
ADAM6	0	0	0	0
ADAM7	0	0	0	0
ADAM8	0.0172765	0.0286487	0.0363607	0
ADAM9	8.77153	8.42758	2.18977	2.4175
ADAMDEC1	0	0	0	0
ADAMTS1	2.37116	2.12083	0.516133	0.437558
ADAMTS10	0.0993928	0.0824091	0	0
ADAMTS12	0	0	0.0161522	0
ADAMTS13	2.08546	2.47424	0.33032	0.279094
ADAMTS14	0.065022	0.0608726	0	0.0148741
ADAMTS15	0.180849	0.0922747	0.0563903	0.0275801
ADAMTS16	1.05303	0.818983	0.104567	0.110154
ADAMTS17	0.690127	0.698592	0.0442367	0.03709
ADAMTS18	0	0	0	0
ADAMTS19	0.134473	0.131507	0.0943421	0.0538324
ADAMTS2	0.266483	1.52544	0.0390903	0.138363
ADAMTS20	0.22037	0.248695	0.0488509	0.0273059
ADAMTS3	0.673609	0.579747	0.0206161	0.0470548
ADAMTS4	2.47286	2.06206	0.997452	1.17445
ADAMTS5	0.416747	0.334244	0.0952297	0.0486013
ADAMTS6	0.289713	0.54047	0.159639	0.096925
ADAMTS7	10.2405	9.56659	0.204053	0.199602
ADAMTS8	7.38669	4.64699	1.22331	0.502157
ADAMTS9	13.3654	12.6505	0.623771	1.13469
ADAMTS9-AS2	0.248083	0.404854	0.359146	0.421575
ADAMTSL1	1.16186	0.839614	0.0255098	0.00499059
ADAMTSL2	1.55331	2.31818	0.579188	0.367211
ADAMTSL3	0	0	0.00545452	0
ADAMTSL4	0.144102	0.166231	0.00952366	0
ADAMTSL5	0.0552757	0.0407382	0.0140038	0
ADAP1	3.38924	3.10772	2.98085	1.80343
ADAP2	0.00957456	0.031754	0.0436619	0.0142365
ADAR	94.4456	87.1852	18.0668	13.4372
ADARB1	1.994	2.01413	1.2069	1.01517
ADARB2	0.0281135	0.0207196	0.00949653	0.0139341
ADARB2-AS1	0	0	0	0
ADAT1	10.0192	9.3133	6.58085	7.19709
ADAT2	1.12808	1.20987	2.18184	2.23439
ADAT3	4.45149	3.81164	2.18991	1.75704
ADC	0.398064	0.533406	0.31171	0.0538078
ADCK1	1.97252	1.73427	1.59449	0.775268
ADCK2	15.7878	16.358	9.81606	9.55227
ADCK3	10.7568	10.0308	13.2724	5.70178
ADCK4	8.76693	9.62538	5.54304	4.4043
ADCK5	1.48284	1.52219	1.32826	1.37803
ADCY1	3.99573	3.95754	0.486407	0.198474
ADCY10	0.0105883	0.010735	0	0.00787193
ADCY10P1	0.115256	0.10837	0.157619	0.223728
ADCY2	0.00401655	0.0044403	0.00610543	0
ADCY3	5.27104	5.02301	0.830738	1.03972
ADCY4	0	0	0	0
ADCY5	0.0102751	0.0143148	0.00780942	0
ADCY6	11.3091	10.8481	2.36916	1.71943
ADCY7	2.89448	2.65943	0.358503	0.395315
ADCY8	0.115525	0.0993323	0.0195118	0.0286292
ADCY9	5.69874	4.83135	0.657581	0.440643
ADCYAP1	7.24494	5.87806	8.75106	9.17421
ADCYAP1R1	19.5621	19.2152	3.7136	2.46585
ADD1	56.4526	56.4382	22.2841	16.2501
ADD2	26.5222	24.2569	4.75943	2.33098
ADD3	31.9825	32.334	29.5337	44.6699
ADD3-AS1	0.164623	0.159254	0.187763	0.183589
ADGB	0.00497645	0.00550147	0.00756455	0
ADH1A	0	0	0	0
ADH1B	0	0	0	0
ADH1C	0	0	0	0
ADH4	0	0	0	0
ADH5	44.8334	46.2936	119.27	127.33
ADH6	0.0376007	0.0207838	0.0285778	0
ADH7	0	0	0	0
ADHFE1	0	0.0614191	0.0633386	0.061957
ADI1	18.2484	15.2778	39.8179	45.6044
ADIG	0	0	0	0
ADIPOQ	5.27804e-24	0.00633016	0	1.1474e-08
ADIPOQ-AS1	0.0152937	0	0	0.0113702
ADIPOR1	50.3816	51.3978	32.9622	24.0467
ADIPOR2	26.9245	24.474	10.4033	7.61996
ADIRF	0	0	0	0
ADK	13.8324	13.4385	21.5147	36.6938
ADM	10.3175	19.84	0.855953	0.756254
ADM2	1.14148	1.11043	0.0890287	0.0870867
ADM5	1.07176	0.71641	0.132605	0.277956
ADNP	50.7129	49.9476	19.6728	18.3948
ADNP2	8.80443	9.15535	3.99569	3.67605
ADO	12.4535	11.5405	10.3675	7.45101
ADORA1	4.23024	5.37958	0.206973	0.211661
ADORA2A	0.167842	0.159116	0.0585496	0.101257
ADORA2A-AS1	0.111786	0.0832487	0.0155798	0
ADORA2B	1.45216	1.68255	1.71922	0.975809
ADORA3	0.0245201	0.027107	0	0
ADPGK	17.9425	18.1642	19.3871	18.1638
ADPGK-AS1	0.0319892	0.0815914	0	0.0155381
ADPRH	0	0.00846097	0	0
ADPRHL1	2.25387	2.18093	2.02549	1.05702
ADPRHL2	12.6855	14.0238	7.85509	6.73485
ADPRM	2.79156	3.64195	12.8882	10.3899
ADRA1A	0	0	0	0
ADRA1B	0	0	0	0
ADRA1D	0	0	0	0
ADRA2A	0.0271835	0.0150257	0.0103302	0
ADRA2B	0.00805893	0.0445457	0	0.0239658
ADRA2C	6.4793	7.17772	1.53252	1.13931
ADRB1	0	0	0	0
ADRB2	0	0	0.019593	0.0191656
ADRB3	0	0	0	0
ADRBK1	23.3094	20.5641	4.98369	2.23863
ADRBK2	12.6094	11.7353	1.21507	0.911953
ADRM1	70.577	61.2066	44.3838	34.1126
ADSL	69.734	71.5279	148.694	218.976
ADSS	30.2184	28.6057	23.8155	23.3241
ADSSL1	0.584899	0.513957	0.113985	0
ADTRP	0	0	0	0
AEBP1	6.13886	6.58712	0.0685419	0.191562
AEBP2	6.67838	6.15862	3.03558	3.47423
AEN	21.0327	19.89	15.4591	15.549
AES	171.82	160.181	162.312	143.653
AFAP1	20.3017	18.3103	3.30595	1.87215
AFAP1-AS1	0.0744283	0.0779252	0	0
AFAP1L1	0.0937385	0.207256	0.0194904	0.00953265
AFAP1L2	0.0729292	0.0292729	0.0907106	0.0196862
AFF1	5.89147	6.26547	0.713355	0.558479
AFF2	0.496059	0.369988	0.0292469	0.0286089
AFF3	3.91708	3.25608	0.600513	0.577794
AFF4	16.8088	17.3581	4.53963	3.51327
AFG3L1P	2.76434	2.93822	0.748271	0.33375
AFG3L2	14.0502	13.2656	3.84006	2.39037
AFM	0	0	0	0
AFMID	5.89895	6.25317	20.1143	23.0152
AFP	0	0.0286391	0	0
AFTPH	6.61914	6.51001	4.58029	4.0996
AGA	5.25554	4.72654	6.98178	6.16593
AGAP1	9.77063	8.21173	0.578961	0.328599
AGAP11	0	0.0368904	0	0.0124045
AGAP2	4.07621	4.43387	0.32136	0.225891
AGAP2-AS1	0.0200532	0.0433469	3.7147e-41	0
AGAP3	38.6585	38.1949	15.3302	11.608
AGAP4	0.0866161	0.119693	0.082289	0
AGAP5	0.80285	1.07945	0.296851	0.306508
AGAP6	3.98795	4.13576	2.58355	2.04717
AGAP7	0.281502	0.287262	0.181036	0.112692
AGAP8	1.31142	1.26068	1.00539	0.661294
AGAP9	0.0220532	0.0609495	0.0335223	0.0163955
AGBL1	0	0	0	0
AGBL1-AS1	0	0	0	0
AGBL2	0	0	0	0
AGBL3	0.0223497	0.057651	0.271784	0.343397
AGBL4	0	0.0194761	0.0133899	0.0261956
AGBL5	15.7047	17.8843	16.2448	10.4576
AGER	1.6499	1.2582	1.14562	1.58849
AGFG1	7.03002	6.98205	5.86015	5.10605
AGFG2	1.23642	0.907211	0.424123	0.414871
AGGF1	15.1162	15.1876	8.78634	5.86869
AGK	9.49336	10.0771	5.93636	3.51891
AGL	7.77625	8.88425	4.61031	3.39324
AGMAT	0.00834511	0.018451	0.0253703	0.0124084
AGMO	0	0	0	0
AGO1	6.75082	6.32685	0.856034	0.512884
AGO2	5.98158	5.47436	0.342936	0.287776
AGO3	2.28411	2.25136	0.548828	0.560878
AGO4	4.4029	3.8659	0.680038	0.604227
AGPAT1	41.8514	43.8074	16.4815	8.63521
AGPAT2	2.05986	2.98189	0.164899	0.101127
AGPAT3	10.0945	9.12599	1.25512	0.514998
AGPAT4	3.11342	2.95811	1.2187	0.948726
AGPAT4-IT1	0.270172	0.267236	0.086459	0.0211433
AGPAT5	15.3516	14.8887	14.9843	15.948
AGPAT6	12.0757	11.187	1.59148	0.60782
AGPAT9	0.0299006	0.0550918	0.0151503	0
AGPS	8.23437	7.39485	3.84169	4.36038
AGR2	0	0	0	0
AGR3	0.035094	0	0	0
AGRN	6.00707	6.25953	0.0109224	0.0373947
AGRP	0	0	0.0523677	0
AGT	0.795427	1.47685	0.387533	0.257774
AGTPBP1	15.0692	15.9347	5.73108	4.93298
AGTR1	0.273683	0.374248	0.212935	0.413414
AGTR2	0	0	0	0
AGTRAP	4.776	5.59092	5.89611	4.88104
AGXT	0.0164709	0.0182086	0.125184	0.146944
AGXT2	0	0	0	0
AHCTF1	11.9877	10.8521	2.91572	3.10151
AHCTF1P1	0.0774482	0.0658607	0.00905588	0.00885835
AHCY	176.781	181.208	499.428	487.42
AHCYL1	55.0549	59.5281	27.4202	27.0631
AHCYL2	5.96643	5.68018	3.02624	1.70234
AHDC1	1.08183	0.931686	0.221724	0.0903699
AHI1	5.289	5.26013	6.38787	6.50698
AHNAK	38.9707	30.1363	4.18875	3.54364
AHNAK2	0.0445452	0.0698957	0.00218425	0.0021366
AHR	0.143252	0.256179	0.198539	0.0751775
AHRR	0.0654895	0.0982553	0.0213318	0.027822
AHSA1	47.0572	44.7682	37.5798	30.7778
AHSA2	4.26372	4.57915	1.22759	0.735982
AHSG	0	0	0	0
AHSP	0	0	0	0
AICDA	0	0	0	0
AIDA	12.1971	12.09	6.189	5.50719
AIF1	0	0	0	0
AIF1L	2.47653	1.10711	0.0591062	0.0792431
AIFM1	20.7199	17.8377	7.28196	6.32293
AIFM2	4.30306	4.19254	0.283274	0.252999
AIFM3	0.170287	0.0878508	0.10188	0.0844003
AIG1	7.65859	7.41613	14.1259	14.6372
AIM1	0.132439	0.0886172	0.0105956	0.00518223
AIM1L	0	0.00554762	0	0
AIM2	0	0	0	0
AIMP1	13.2502	14.4198	12.9634	14.3747
AIMP2	34.6324	31.5609	51.5451	56.3042
AIP	27.217	31.6223	60.5487	45.7382
AIPL1	0	0	0	0
AIRE	0	0.0126565	0	0
AIRN	0.00601748	0	0	0
AJAP1	1.26635	2.6734	0.0136876	0.145389
AJUBA	5.51384	5.33201	0.425796	0.385658
AK1	26.8664	21.457	29.733	24.663
AK2	35.2209	41.1938	55.4299	97.7072
AK3	11.5684	13.0047	19.5181	19.2885
AK4	5.07111	8.56921	1.17602	2.09299
AK5	1.56735	1.29516	0.373015	0.470811
AK7	0.303084	0.326242	0.315222	0.533675
AK8	0.187468	0.15198	0.455942	0.241581
AK9	1.0877	1.13507	3.1196	3.51603
AKAP1	28.1486	26.4462	11.7252	10.5362
AKAP10	4.9689	5.19779	5.52267	4.8163
AKAP11	9.74016	9.20436	4.46874	4.21345
AKAP12	15.9722	14.4623	1.71219	2.33216
AKAP13	7.07531	6.15632	0.258603	0.171499
AKAP14	0	0	0	0
AKAP17A	14.4235	14.8472	3.17126	2.32181
AKAP2	0	0	0	0
AKAP3	0.0474642	0.0437264	0.0360744	0.0117625
AKAP4	0.0368438	0.0305481	0.0280025	0.0273917
AKAP5	0.896689	0.968863	1.18417	1.71941
AKAP6	0.945175	0.773163	0.5277	0.486047
AKAP7	1.54299	1.59668	1.2277	0.880391
AKAP8	7.82259	8.5329	3.12799	2.06561
AKAP8L	19.2112	19.4074	5.56415	2.68436
AKAP9	4.78032	4.2663	0.678039	0.615853
AKIP1	7.49737	6.63652	13.016	13.4011
AKIRIN1	16.4303	15.2817	29.3218	31.5619
AKIRIN2	33.6499	32.0341	26.8176	21.5938
AKNA	1.46522	1.44639	0.0325143	0.0106017
AKNAD1	3.4339	3.00784	0.311828	0.229994
AKR1A1	49.9842	56.8209	114.156	92.835
AKR1B1	123.187	117.742	129.013	123.175
AKR1B10	0	0	0	0
AKR1B15	0	0	0	0
AKR1C1	0.591686	0.78071	0.435195	0.539222
AKR1C2	0.0373374	0.0330212	0.147564	0.166552
AKR1C3	0.217989	0.35836	0.298222	0.259304
AKR1C4	0	0	0	0
AKR1C6P	0	0	0	0
AKR1CL1	0	0	0	0
AKR1D1	0	0	0	0
AKR1E2	3.77606	4.61708	3.47058	3.80971
AKR7A2	6.43188	7.08823	8.40202	9.83261
AKR7A2P1	0.437349	0.461513	0.0302182	0
AKR7A3	0.381763	0.398593	0.290153	0.220752
AKR7L	0.30714	0.214526	0.174239	0.0923338
AKT1	45.0366	45.7716	10.8033	7.2379
AKT1S1	22.3941	21.5813	12.9357	6.41041
AKT2	14.5802	14.065	6.3738	3.79828
AKT3	34.8071	33.99	6.80205	5.07873
AKTIP	4.93884	5.20526	5.18944	4.69556
ALAD	11.4113	12.3958	6.54874	4.61076
ALAS1	28.5352	25.6134	30.0385	21.7095
ALAS2	0.0136504	0.0603622	0	0
ALB	0.0702816	0.0776963	0.0178055	0.0696683
ALCAM	31.1476	28.444	5.79665	17.0678
ALDH16A1	10.4044	8.68663	2.70995	1.78899
ALDH18A1	33.9792	33.7714	20.5989	21.2135
ALDH1A1	0.0333311	0	0.0168885	0.0660805
ALDH1A2	0.0908509	0.0331013	0	0
ALDH1A3	10.8671	10.848	0.183159	0.828634
ALDH1B1	29.4926	27.5713	28.5405	26.9746
ALDH1L1	0.0641665	0.0635692	0	0
ALDH1L1-AS1	0	0	0	0
ALDH1L1-AS2	0	0	0	0
ALDH1L2	2.33893	1.99711	0.71133	0.654611
ALDH2	71.0838	88.6891	10.9258	9.89271
ALDH3A1	0.207417	0.131028	0.0450411	0.101498
ALDH3A2	13.6166	13.6622	6.81537	7.27293
ALDH3B1	0.154502	0.214321	0.224214	0.0574328
ALDH3B2	0.0105233	0	0.0159961	0
ALDH4A1	4.22587	3.73736	3.76548	2.36849
ALDH5A1	5.20201	5.38954	3.87017	2.76569
ALDH6A1	1.4415	1.66251	0.455363	0.422192
ALDH7A1	16.1249	15.9224	6.68702	5.11404
ALDH8A1	0.120835	0.137191	0.100189	0.032552
ALDH9A1	34.564	33.4968	34.3756	33.4223
ALDOA	531.597	810.53	296.819	224.389
ALDOB	0.065096	0.119939	0.0329834	0
ALDOC	16.9784	36.1293	6.90644	6.44763
ALG1	6.04624	5.85366	9.23958	8.11625
ALG10	2.62615	2.23324	3.23705	4.1802
ALG10B	2.09278	2.29913	3.84044	3.20113
ALG11	6.36202	5.87389	4.26262	4.09204
ALG12	6.97664	7.43066	3.22027	1.86363
ALG13	8.94033	8.83119	9.38552	10.32
ALG14	7.61974	7.15732	15.8976	19.9198
ALG1L	0.255679	0.244656	0.475293	0.427282
ALG1L2	0	0	0	0
ALG1L9P	0.185312	0.230012	0.0397307	0.0246449
ALG2	7.83652	8.21073	8.1915	7.1564
ALG3	28.1299	28.9594	22.7117	14.5707
ALG5	29.46	29.5917	60.2926	92.6603
ALG6	2.38922	1.91623	3.06209	2.56574
ALG8	26.0388	22.539	18.9198	25.0364
ALG9	4.11408	4.01913	2.05187	1.67272
ALK	488.338	423.655	42.525	29.3225
ALKBH1	3.72661	3.39937	7.11957	8.90215
ALKBH2	37.1497	39.6149	115.351	146.029
ALKBH3	7.04563	8.01149	7.44589	6.01136
ALKBH3-AS1	0.0409763	0.0150998	0.0207623	0
ALKBH4	6.6962	6.09988	4.48418	3.80359
ALKBH5	32.7223	35.4117	12.3535	9.41639
ALKBH6	7.87073	8.0466	6.6124	5.35261
ALKBH7	17.5008	18.2323	61.2909	57.5722
ALKBH8	1.06783	0.951546	0.865695	0.663977
ALLC	0.0182275	0	0	0
ALMS1	6.15135	5.01918	0.421081	0.472469
ALMS1P	0	0	0	0.024583
ALOX12	0.0446488	0.0370194	0.0339346	0.0165972
ALOX12B	0.736384	0.89548	0.447741	0.265913
ALOX12P2	0	0	0	0
ALOX15	0	0.010841	0	0
ALOX15B	0.0581668	0.0660733	0.0159731	0.0468739
ALOX15P1	0	0	0	0
ALOX5	0.0109341	0	0	0
ALOX5AP	0	0	0.0441599	0
ALOXE3	0.21084	0.304802	0.0123266	0.0120577
ALPI	0	0	0	0
ALPK1	0.153337	0.177675	0.00761714	0
ALPK2	0.0360554	0.0159437	0	0
ALPK3	0.00241096	0.0133266	0	0
ALPL	0.0113203	0	0	0
ALPP	0	0	0	0.0136506
ALPPL2	0	0	0	0
ALS2	5.95463	6.06912	2.06784	3.12682
ALS2CL	0.0522176	0.0700444	0	0
ALS2CR11	0.059966	0.0866901	0.00701172	0.0137175
ALS2CR12	0.270782	0.178669	0.0617421	0.040052
ALX1	3.25698	4.14068	1.51619	1.0291
ALX3	1.65616	1.3584	0.0541392	0.0264791
ALX4	0.00963061	0.0212933	0	0
ALYREF	212.891	171.693	145.848	170.137
AMACR	1.89863	1.58936	3.02213	1.70431
AMBN	0.0525883	0.0726705	0.0199845	0.0390971
AMBP	0	0	0	0
AMBRA1	7.84792	8.19135	1.67742	1.11466
AMD1	35.8118	29.1642	55.0554	68.9389
AMDHD1	0.32038	0.245202	1.01146	0.916109
AMDHD2	7.90737	7.60309	8.12111	6.00007
AMELX	0	0	0	0
AMELY	0	0	0	0
AMER1	7.93074	9.46704	1.66802	1.19128
AMER2	0	0	0	0
AMER3	1.93391	1.41422	2.96467	1.70447
AMFR	12.6558	10.6448	3.61191	2.71779
AMH	5.8432	4.5852	1.24904	1.02786
AMHR2	0.07064	0.0468555	0	0
AMICA1	0	0	0	0
AMIGO1	2.29013	1.54259	1.24674	0.52266
AMIGO2	0.550838	0.570907	0.0654166	0.0127979
AMIGO3	3.03766	2.20286	0.175005	0.144851
AMMECR1	17.5928	15.1169	7.98678	5.43883
AMMECR1L	10.3764	9.67085	4.78657	3.69244
AMN	0.0169046	0.0373761	0	0
AMN1	5.76447	5.82917	11.6652	15.0405
AMOT	3.81996	4.58153	0.560292	0.324158
AMOTL1	16.7914	14.3142	1.47605	1.41341
AMOTL2	0.420492	0.372149	0.239793	0.0939498
AMPD1	0.0109703	0.0121276	0.0166756	0
AMPD2	25.0187	26.3032	6.2083	3.63958
AMPD3	0.781115	1.12467	0.437418	0.41045
AMPH	0.666575	0.775778	0.157601	0.118592
AMT	0.744852	1.23039	0.408073	0.306769
AMTN	0	0	0	0
AMY1A	0	0	0	0
AMY1B	0	0	0	0
AMY1C	0	0	0	0
AMY2A	0	0	0	0
AMY2B	1.18571	1.58335	3.55119	2.19945
AMZ1	0.0357696	0.0263622	0.00906204	0
AMZ2	40.5864	41.3573	60.5691	53.5916
AMZ2P1	2.55405	3.26309	6.04434	6.51511
ANAPC1	6.5563	5.67577	1.36018	1.52275
ANAPC10	5.34244	5.07989	8.96964	7.62118
ANAPC11	114.724	105.829	293.054	434.014
ANAPC13	18.8948	20.1048	30.5732	27.5076
ANAPC15	26.2542	26.0076	47.3277	53.8456
ANAPC16	9.43335	10.3005	18.7017	21.585
ANAPC1P1	0	0.0328597	0	0
ANAPC2	18.5511	17.4584	6.75706	4.88477
ANAPC4	8.40245	8.54841	8.07066	9.27141
ANAPC5	81.2785	73.4946	119.424	133.786
ANAPC7	34.2948	28.8833	37.5776	45.1651
ANG	3.15901	5.10788	2.42574	1.42655
ANGEL1	4.54574	4.39538	2.97804	1.79925
ANGEL2	8.36774	8.4056	7.05685	7.01235
ANGPT1	0.194225	0.181113	0.0369171	0.0360995
ANGPT2	0.240021	0.110932	0.190114	0.156128
ANGPT4	0	0	0	0
ANGPTL1	0	0.024617	0	0.0110367
ANGPTL2	7.65592	6.37012	4.99551	3.36361
ANGPTL3	0.0178383	0.00986014	0.0135577	0
ANGPTL4	7.7852	14.1524	0.126152	0.226962
ANGPTL5	0.0222301	0.0122877	0	0.0165271
ANGPTL6	0.0522463	0.039968	0.0521806	0.107573
ANGPTL7	0	0	0	0
ANHX	0	0	0	0
ANK1	0.152959	0.102024	0.00511963	0.0376826
ANK2	16.7155	12.6944	1.92686	3.55334
ANK3	1.21022	1.10703	0.189581	0.207687
ANKAR	0.095364	0.230617	0.11778	0.15066
ANKDD1A	0.862689	0.906952	0.231414	0.264094
ANKDD1B	0.319724	0.159625	0.12542	0.521407
ANKEF1	1.6478	1.52866	1.54937	0.956909
ANKFN1	0	0	0.0659669	0.0483959
ANKFY1	8.43662	7.28963	1.93214	1.98952
ANKH	13.913	13.9175	10.0511	5.65426
ANKHD1	11.2514	11.7721	2.94558	2.21989
ANKHD1-EIF4EBP3	3.80261	2.97677	0.39274	0.228938
ANKIB1	11.2623	10.7805	4.33578	5.52193
ANKK1	0	0	0	0
ANKLE1	0.456565	0.316484	0.0938055	0.0974094
ANKLE2	25.3994	23.4058	9.90799	7.23378
ANKMY1	1.61283	1.38498	0.275827	0.206313
ANKMY2	4.79022	6.62803	2.81863	2.51207
ANKRA2	5.66405	5.79827	9.083	8.52876
ANKRD1	0	0	0	0
ANKRD10	29.4747	26.0534	25.9938	23.3405
ANKRD11	10.7227	8.56521	1.69812	1.17821
ANKRD12	1.01403	1.17477	0.468599	0.339683
ANKRD13A	9.71864	9.28462	3.26582	1.90273
ANKRD13B	22.3388	19.6519	8.59945	4.48962
ANKRD13C	2.77278	2.95748	1.84265	1.60909
ANKRD13D	11.122	11.0625	7.05405	5.16327
ANKRD16	8.01072	7.75444	6.7439	5.17003
ANKRD17	12.616	11.3514	1.48273	0.979034
ANKRD18A	0.0140826	0.0155684	0.0428132	0.0628189
ANKRD18B	0.988858	0.88385	0.181229	0.15642
ANKRD18DP	0	0	0	0
ANKRD19P	0.33086	0.277477	0.0693696	0.0339282
ANKRD2	0	0	0.029531	0
ANKRD20A1	0	0	0	0
ANKRD20A11P	0.0241694	0	0	0
ANKRD20A12P	1.37337	1.23463	1.85821	1.09958
ANKRD20A19P	0.00516493	0	0	0
ANKRD20A2	0	0	0	0
ANKRD20A3	0	0	0	0
ANKRD20A4	0.00748378	0	0.0113759	0
ANKRD20A5P	0	0	0	0
ANKRD20A8P	0	0	0	0
ANKRD20A9P	0	0	0.001065	0.00104177
ANKRD22	0	0	0	0
ANKRD23	1.42714	1.16074	0.433869	0.303146
ANKRD24	0.0849891	0.0289094	0	0.00972086
ANKRD26	1.53399	1.39096	0.791122	0.461984
ANKRD26P1	0	0	0	0
ANKRD26P3	0.007064	0	0	0
ANKRD27	7.61302	8.0372	4.10601	2.7245
ANKRD28	7.46842	7.19378	2.5318	2.03556
ANKRD29	0	0	0	0
ANKRD30A	0	0	0	0
ANKRD30B	0	0	0	0
ANKRD30BL	0	0	0.0231667	0
ANKRD30BP2	0	0.00851295	0	0
ANKRD30BP3	0	0	0	0
ANKRD31	0.14826	0.15426	0.125939	0.123192
ANKRD32	3.16149	2.54878	2.01461	2.15541
ANKRD33	0	0	0	0
ANKRD33B	0.465325	0.364768	0.0128605	0.0125799
ANKRD34A	1.98934	2.33616	1.4732	1.01849
ANKRD34B	0.00668881	0	0.0101674	0
ANKRD34C	0	0	0.0147525	0.00721537
ANKRD35	0.0679885	0.103347	0.0258368	0
ANKRD36	0.558491	0.798458	0.319152	0.206046
ANKRD36B	0.259423	0.213879	0.0467862	0.0523036
ANKRD36BP1	15.2801	13.7465	1.73011	0.67695
ANKRD36BP2	0	0	0	0
ANKRD37	3.20526	5.76199	5.08167	6.68639
ANKRD39	6.12581	6.61007	9.66807	11.244
ANKRD40	34.5279	31.4982	19.5678	13.6399
ANKRD42	0.390389	0.431576	0.109314	0.0305513
ANKRD44	1.45351	1.27176	0.56369	0.825442
ANKRD45	3.26173	3.3226	3.50508	4.8792
ANKRD46	8.06559	7.96829	23.3855	24.132
ANKRD49	4.21404	4.42951	22.5772	24.6527
ANKRD50	7.01852	6.54215	1.79291	1.62888
ANKRD52	20.5978	17.0933	0.892065	0.56516
ANKRD53	0.0790193	0.0549005	0.0200191	0
ANKRD54	13.4352	11.7601	17.1426	15.4441
ANKRD55	0	0.0349167	0.0160036	0.0782723
ANKRD6	0.812554	0.584959	0.165286	0.123766
ANKRD61	0.388426	0.408957	0.224927	0
ANKRD62	0.0500495	0.024591	0	0.0248064
ANKRD62P1-PARP4P3	0	0	0.0260136	0
ANKRD63	0	0	0	0
ANKRD65	0.26124	0.0887771	0.267192	0.119403
ANKRD66	0	0	0	0
ANKRD7	0.349129	0.428847	0.79605	0.634485
ANKRD9	8.93536	8.32118	0.935017	1.15531
ANKS1A	7.43073	7.17467	0.951243	0.67168
ANKS1B	0.16334	0.0861716	11.3111	7.36827
ANKS3	5.84993	6.48992	3.60427	2.2196
ANKS4B	0	0	0	0
ANKS6	0.187819	0.215777	0.022392	0.0109518
ANKUB1	0	0	0	0
ANKZF1	9.9634	12.4509	5.68663	4.58795
ANLN	21.7185	18.4161	5.76229	6.39963
ANO1	0.0446327	0.0242815	0	0
ANO1-AS2	0	0	0	0
ANO10	4.05999	4.34179	3.67767	2.5656
ANO2	0.00709463	0	0	0
ANO3	0.00886808	0.00490183	0.0337002	0.013186
ANO4	0.172488	0.169499	0.349592	0.20898
ANO5	0.00790466	0.0043693	0	0
ANO6	27.8015	25.7828	7.76814	7.52429
ANO7	0.165778	0.232609	0	0.0439239
ANO8	10.2632	10.4349	1.25269	1.00857
ANO9	0.00915494	0	0	0.0136126
ANP32A	98.0987	85.3921	27.8894	17.5526
ANP32A-IT1	0.15242	0.0620789	0	0.0119281
ANP32AP1	0	0	0	0.05303
ANP32B	167.451	150.312	76.2793	53.2794
ANP32C	0	0	0	0
ANP32D	0	0	0	0
ANP32E	121.294	105.103	24.7768	23.8777
ANPEP	0.0432665	0.0159437	0	0
ANTXR1	30.3406	29.0687	5.33707	4.03078
ANTXR2	12.8881	12.0076	2.50471	2.4235
ANTXRL	0	0	0	0
ANTXRLP1	0	0	0	0
ANXA1	0	0.0207986	0	0.0279744
ANXA10	0	0	0	0
ANXA11	11.1116	11.8402	2.03334	2.64926
ANXA13	0	0	0	0
ANXA2	443.319	511.783	375.541	580.325
ANXA2P1	0.0391965	0.0433318	0.0297907	0.0291409
ANXA2P2	0.703219	0.488657	0.335953	0.955998
ANXA2P3	0	0	0	0
ANXA2R	0.644498	0.75846	0.695257	0.649178
ANXA3	0	0	0	0
ANXA4	3.71092	4.6322	4.53882	4.75042
ANXA5	36.9705	41.3258	59.05	89.4331
ANXA6	55.0166	75.1757	42.2516	38.3696
ANXA7	17.7447	16.9303	21.7017	27.7679
ANXA8	0	0	0	0
ANXA8L1	0	0	0	0
ANXA8L2	0	0	0	0
ANXA9	0.793654	0.941195	1.1406	0.750968
AOAH	0	0.074185	0.156594	0.0997796
AOAH-IT1	0	0	0	0
AOC1	0.0107446	0.0118782	0	0.0159763
AOC2	0.0303901	0.0559938	0.0769917	0.0150624
AOC3	0.0549717	0.0370841	0	0.0299271
AOC4P	0	0	0.0193	0
AOX1	0.0160068	0.0058985	0	0
AOX2P	0	0	0	0
AP1AR	6.24148	5.68449	12.8036	11.6199
AP1B1	26.1176	24.2799	5.66735	3.5529
AP1B1P1	0	0	0	0
AP1G1	14.9199	14.0198	7.30817	5.43881
AP1G2	4.09916	4.05727	1.7902	1.14028
AP1M1	32.4945	32.2748	11.5786	7.39281
AP1M2	0.120253	0.182793	0	0.0223508
AP1S1	46.3906	46.4839	91.9557	101.356
AP1S2	26.4302	25.6256	69.3298	60.6734
AP1S3	0.822103	0.697986	0.569842	0.723657
AP2A1	19.6289	19.5595	4.58647	2.44051
AP2A2	14.4618	14.8054	4.7798	2.88438
AP2B1	42.2697	42.4715	14.053	9.91221
AP2M1	133.298	135.356	95.7999	76.8999
AP2S1	66.3974	65.1916	79.481	86.5263
AP3B1	26.652	24.7354	10.8479	7.82694
AP3B2	1.83028	1.28924	2.8947	2.23801
AP3D1	23.674	21.1288	2.13611	1.31753
AP3M1	16.133	15.4594	10.4771	9.99309
AP3M2	4.8526	5.15327	2.82064	3.21373
AP3S1	23.0738	24.6277	21.7892	24.4715
AP3S2	6.53493	6.89645	9.1996	7.84615
AP4B1	8.85054	8.01257	8.38466	9.63437
AP4B1-AS1	0.442304	0.447426	0.178317	0.341064
AP4E1	3.95235	3.37301	1.41381	1.04062
AP4M1	8.04303	8.45006	8.5924	7.88051
AP4S1	0.645588	0.809588	1.71327	2.30506
AP5B1	2.84157	2.81928	0.248729	0.142421
AP5M1	9.70467	8.86577	6.49261	5.75758
AP5S1	3.47908	3.54906	3.59294	2.62862
AP5Z1	5.32228	5.01914	1.91382	1.30478
APAF1	5.03652	4.83711	4.70135	5.43943
APBA1	1.87889	2.18318	0.388908	0.202101
APBA2	33.2587	31.538	10.822	6.21805
APBA3	4.72012	4.90797	7.99065	7.87076
APBB1	26.5842	28.5417	17.0055	12.5023
APBB1IP	0	0	0	0
APBB2	3.37377	3.01357	0.314945	0.548196
APBB3	5.19454	5.41813	7.2836	4.45237
APC	3.61	3.3111	0.5082	0.468147
APC2	9.30849	6.28898	0.748861	0.331564
APCDD1	0	0	0	0
APCDD1L	0.735823	2.69281	0.0257127	0
APCDD1L-AS1	0	0.0416469	0.0190882	0.0186718
APCS	0	0	0	0
APEH	34.3368	38.4869	29.0275	28.7207
APEX1	184.076	184.492	360.549	302.161
APEX2	26.2993	24.6781	16.2783	10.8202
APH1A	176.652	182.717	210.073	152.285
APH1B	3.63938	3.11063	2.97027	3.07122
API5	30.6729	28.1651	34.7524	50.8129
APIP	6.10745	6.88108	9.9537	11.7325
APITD1	4.19468	4.53195	4.70234	6.57804
APITD1-CORT	0.374654	0.103463	0.0612282	0.704209
APLF	1.12831	1.20955	1.17459	1.12863
APLN	13.2745	17.193	0.682534	1.12893
APLNR	0	0	0	0
APLP1	34.7379	31.7601	13.5168	6.5555
APLP2	141.914	168.923	35.27	31.5152
APMAP	50.5434	45.3556	55.8611	55.9994
APOA1	0	0.0324384	0.267618	0.479931
APOA1BP	104.953	105.851	219.96	280.936
APOA2	0	0.0615164	0	0
APOA4	0	0	0	0
APOA5	0	0.0151836	0.0208775	0
APOB	0	0.00412114	0	0
APOBEC1	0.0885217	0.0978608	0.044853	0.0438746
APOBEC2	0.064432	0.0178074	0.342793	0.0718534
APOBEC3A	0	0	0	0
APOBEC3A_B	0	0	0	0
APOBEC3B	0	0	0.0272412	0
APOBEC3C	0	0	0.0360765	0.0352896
APOBEC3D	0	0	0.0319688	0
APOBEC3F	0.0224482	0	0	0
APOBEC3G	0	0	0	0
APOBEC3H	0	0	0	0
APOBEC4	0.0189492	0.0104742	0	0
APOBR	0.0138821	0.00767333	0	0
APOC1	3.25437	3.47148	4.079	5.17854
APOC1P1	0	0	0	0
APOC2	0	0	0.0548819	0
APOC3	0	0	0	0
APOC4	0	0	0	0
APOC4-APOC2	0	0	5.82265e-22	0
APOD	0	0.0257498	0	0
APOE	0.736081	1.08498	0.305153	0.0663325
APOF	0	0	0.0473758	0
APOH	0	0.0242275	0	0
APOL1	0.00927788	0.0410268	0	0
APOL2	4.6457	3.84366	1.17865	0.814706
APOL3	0.384895	0.518142	0	0.0183288
APOL4	0.648152	0.675021	0.831967	0.952202
APOL5	0	0.0809945	0	0
APOL6	0.158354	0.18367	0	0.00385996
APOLD1	2.08418	2.13261	0.930929	0.495854
APOM	2.02262	2.12219	5.55974	4.95904
APOO	24.7483	23.0136	37.4767	41.7444
APOOL	3.60843	3.69789	2.77779	1.83366
APOOP5	0	0	0	0.0372371
APOPT1	14.7906	15.4793	36.8989	44.0797
APP	128.188	122.975	25.2352	21.9795
APPBP2	13.1521	11.9214	9.1919	7.78125
APPL1	12.5956	12.8825	4.39042	3.74571
APPL2	11.8203	12.1908	12.6266	9.53406
APRT	31.818	32.2982	73.6536	70.7335
APTX	13.6858	13.4733	28.5464	32.8235
AQP1	5.45031	15.1902	0.142533	0.239453
AQP10	0	0	0.0670166	0.0437032
AQP11	0.806851	1.00009	0.78048	0.7271
AQP12A	0	0	0	0
AQP12B	0	0	0	0
AQP2	0.0881758	0.0696274	0	0.00936496
AQP3	0.295419	0.373241	0.342139	0.481097
AQP4	0.0910782	0.207004	3.85256	2.96716
AQP4-AS1	0.0110035	0.0243288	0.150535	0.0818064
AQP5	0.144222	0.0797186	0	0
AQP6	0.43636	0.296016	0.165824	0.324414
AQP7	0	0	0	0
AQP7P1	0	0	0	0
AQP7P3	0	0	0	0
AQP8	0	0	0	0
AQP9	0	0	0	0
AQPEP	0.0227833	0.0377805	0.0259742	0.0084692
AQR	16.5125	15.425	5.27676	3.93673
AR	10.1143	11.8895	0.133247	0.400679
ARAF	21.7392	23.0533	16.5043	14.125
ARAP1	8.01335	8.6566	1.10649	0.898145
ARAP2	0	0.00395236	0	0.00531597
ARAP3	3.61644	3.7602	1.05687	0.870189
ARC	13.5977	12.8016	9.54079	8.37684
ARCN1	24.805	25.0213	11.8301	9.4233
AREG	0	0	0	0
AREL1	12.8823	11.4946	1.75613	0.718754
ARF1	292.267	303.27	377.528	288.016
ARF3	51.3163	49.1371	12.3183	10.1907
ARF4	122.239	124.767	184.271	200.787
ARF5	130.137	127.247	227.715	192.36
ARF6	21.0216	19.0215	8.55229	7.85903
ARFGAP1	20.459	20.3079	3.51521	2.06499
ARFGAP2	22.2647	22.9587	11.9934	8.0374
ARFGAP3	10.3992	10.5494	7.54364	7.71293
ARFGEF1	6.46992	6.17789	2.75771	2.50797
ARFGEF2	6.31411	6.14649	1.87514	1.36916
ARFIP1	8.39087	8.19097	13.607	15.5703
ARFIP2	7.96417	8.75484	8.51728	7.31489
ARFRP1	8.51807	8.33786	2.29242	1.51457
ARG1	0	0	0	0
ARG2	3.89373	4.95264	2.58088	4.68429
ARGFX	0	0	0	0
ARGFXP2	0.0437217	0.0725015	0.06646	0
ARGLU1	52.5808	47.5427	59.4992	52.7478
ARHGAP1	13.7178	13.4763	2.6123	0.953987
ARHGAP10	0.783757	0.56176	0.183287	0.153676
ARHGAP11A	18.1968	15.0526	2.95765	3.4531
ARHGAP11B	3.07978	2.71803	0.550762	0.57723
ARHGAP12	3.70994	4.02397	2.74599	3.06824
ARHGAP15	0.0149633	0	0.0227452	0
ARHGAP17	21.9995	19.2637	3.8101	2.39041
ARHGAP18	0.338503	0.340951	1.15487	0.905982
ARHGAP19	8.15984	6.98359	0.636605	0.632292
ARHGAP19-SLIT1	3.27083e-06	8.33658e-09	1.25185e-12	0
ARHGAP20	0.00440484	0	0	0
ARHGAP21	12.6993	10.7912	1.64122	1.6491
ARHGAP22	1.04631	0.747349	0.128034	0.0782971
ARHGAP23	9.49694	5.96627	1.02292	0.43735
ARHGAP24	1.00487	0.783395	0.103424	0.0589908
ARHGAP25	0.0357253	0.0100256	0	0.0134846
ARHGAP26	8.22853	8.27703	0.367783	0.508776
ARHGAP26-AS1	0	0.0595645	0	0.080115
ARHGAP27	0.0937357	0.0398558	0.164406	0.0830672
ARHGAP28	0.832775	1.00481	0.159139	0.106137
ARHGAP29	11.2216	9.33845	7.11357	6.73947
ARHGAP30	0.09517	0.119088	0.0180831	0.0353795
ARHGAP31	2.6845	2.99653	0.138662	0.121105
ARHGAP32	2.51321	2.39372	0.323465	0.315236
ARHGAP33	4.59413	4.5227	0.587691	0.337201
ARHGAP35	15.248	12.424	0.504162	0.281809
ARHGAP36	0.00852623	0.00942575	0.0388813	0.0253555
ARHGAP39	3.37258	2.82882	0.33451	0.258726
ARHGAP4	2.69415	3.13972	1.15335	0.888524
ARHGAP40	0	0.041011	0	0
ARHGAP42	1.83889	1.9288	0.488324	0.411786
ARHGAP44	0.352506	0.287144	0.253816	0.119542
ARHGAP5	4.05636	3.85712	2.03734	1.76873
ARHGAP5-AS1	0.390389	0.408861	0.624651	0.48882
ARHGAP6	0.426422	0.458384	0.0304096	0
ARHGAP8	0.0171775	0.0189897	0	0.0255414
ARHGAP9	0.0406083	0.0418662	0.0191887	0.0453051
ARHGDIA	426.165	413.24	193.794	144.345
ARHGDIB	0.367967	0.167501	0.296118	0.128737
ARHGDIG	14.1382	13.0042	79.0834	71.2926
ARHGEF1	9.37102	9.81095	4.39825	2.72784
ARHGEF10	3.2624	2.91441	0.56532	0.734984
ARHGEF10L	2.18162	2.0084	0.596172	0.230589
ARHGEF11	29.7024	27.1808	2.43992	1.17336
ARHGEF12	6.11594	5.17739	0.575851	0.343567
ARHGEF15	0	0	0	0.00940706
ARHGEF16	0.018127	0.0500986	0.0137772	0
ARHGEF17	4.00214	3.58642	0.486477	0.345629
ARHGEF18	8.47143	7.69852	1.20285	0.719135
ARHGEF19	2.40699	2.17101	0.634014	0.594343
ARHGEF2	45.7788	42.7451	12.6824	7.40116
ARHGEF25	16.0008	16.8657	15.27	13.0041
ARHGEF26	2.43102	1.79711	0.0931242	0.0994373
ARHGEF26-AS1	0.0202621	0.0111999	0	0.015064
ARHGEF28	10.2566	9.51303	0.116266	0.376054
ARHGEF3	1.90123	1.94552	3.40789	2.34575
ARHGEF3-AS1	0	0	0	0
ARHGEF33	0.00611535	8.91074e-33	0.00929575	0
ARHGEF34P	0	0	0	0
ARHGEF35	0	0	0	0
ARHGEF37	1.19024	1.65074	0.205596	0.112622
ARHGEF38	0.00964826	0	0.014666	0.00717305
ARHGEF38-IT1	0.0581026	0	0	0
ARHGEF39	3.77835	3.06889	0.977061	0.668886
ARHGEF4	1.80791	1.55474	0.514285	0.33369
ARHGEF40	22.3037	19.6701	1.30559	1.88078
ARHGEF5	0	0	0	0
ARHGEF6	2.39277	2.73909	0.288544	0.319388
ARHGEF7	25.3488	22.2278	7.38492	4.74485
ARHGEF9	4.688	4.89993	2.1179	1.59871
ARID1A	17.8728	14.8545	1.11439	0.783202
ARID1B	9.22283	7.71478	1.65708	1.6896
ARID2	7.59208	7.24167	2.689	2.59798
ARID3A	3.27835	3.33428	0.0427141	0.0417824
ARID3B	4.23883	4.33612	0.509427	0.276842
ARID3C	0.0212433	0	0	0.0315869
ARID4A	2.61409	2.52204	1.73577	1.79177
ARID4B	9.46347	9.77157	4.26362	3.4299
ARID5A	2.06412	2.3874	2.17637	1.80956
ARID5B	2.17698	2.50792	1.06852	0.663949
ARIH1	13.5387	13.2991	5.6078	4.53893
ARIH2	24.2331	23.0141	17.7032	15.3582
ARIH2OS	0.512987	0.713969	5.42403	3.30497
ARL1	11.6761	12.5182	27.8816	38.0389
ARL10	7.13553	6.42439	1.68021	1.20419
ARL11	0	0	0	0
ARL13A	0.0232902	0	0	0
ARL13B	3.66045	3.45771	1.91558	2.44316
ARL14	0	0	0	0
ARL14EP	7.8664	6.87156	17.0659	16.8706
ARL14EPL	0	0	0	0
ARL15	5.02905	5.41916	7.19388	5.82477
ARL16	34.9995	34.8589	100.901	142.862
ARL17A	0.248918	0.264945	0.0745584	0.0445432
ARL17B	1.46113e-22	0.119251	0.00942453	0.0801971
ARL2	59.3237	66.9591	81.859	84.4949
ARL2-SNX15	0.742141	0.61124	0.438562	0.764484
ARL2BP	41.9623	41.0964	75.4263	70.4078
ARL3	13.201	12.5808	23.6501	35.5499
ARL4A	3.18581	3.12118	1.48831	1.7268
ARL4C	10.691	11.3761	1.95652	1.93337
ARL4D	4.30095	3.74501	6.41152	7.3334
ARL5A	7.84668	7.8275	15.7235	16.42
ARL5B	11.7632	11.5854	16.6211	13.9686
ARL5C	0	0	0	0
ARL6	5.40447	4.63865	14.4524	29.4218
ARL6IP1	191.091	178.799	154.045	135.594
ARL6IP4	88.1154	91.0701	152.42	134.774
ARL6IP5	28.3489	35.6879	36.8127	39.173
ARL6IP6	17.8059	15.9305	24.302	31.0386
ARL8A	68.7581	66.5345	38.5465	20.7621
ARL8B	23.3049	24.4378	22.9867	22.6819
ARL9	0	0	0	0
ARMC1	12.7103	12.5017	31.0523	41.0531
ARMC10	9.12166	10.7576	17.9741	20.5864
ARMC12	0.833069	0.472924	0.958297	0.669567
ARMC2	0.763471	0.647932	0.715073	0.768275
ARMC3	0	0	0	0
ARMC4	0	0.00814593	0	0
ARMC5	4.38783	4.55679	1.86883	0.976401
ARMC6	25.6483	22.6936	36.0999	31.6655
ARMC7	5.55874	5.41981	4.74235	3.47918
ARMC8	4.34037	4.99822	5.21794	5.56186
ARMC9	7.09167	6.67407	6.09395	5.40329
ARMCX1	9.06964	10.8041	22.3209	16.0912
ARMCX2	15.3833	15.0345	8.96395	5.54621
ARMCX3	13.6347	15.02	6.34323	5.61602
ARMCX4	4.12509	4.05603	0.923075	0.994914
ARMCX5	3.33498	4.08366	4.01459	3.14947
ARMCX5-GPRASP2	1.2674	1.35338	1.65806	1.25138
ARMCX6	6.27452	6.57219	9.36084	11.396
ARMS2	0	0.072023	0	0
ARNT	18.0385	19.3438	7.73687	5.41289
ARNT2	15.0466	13.4305	3.06869	1.74257
ARNTL	3.70817	3.3998	2.91028	3.7092
ARNTL2	2.40337	2.3548	2.5397	3.36697
ARPC1A	94.4063	87.9399	92.0723	94.1311
ARPC1B	21.687	18.6823	1.28049	2.47956
ARPC2	84.6731	89.4472	86.3724	102.682
ARPC3	133.804	143.649	153.333	215.556
ARPC4	101.621	101.022	277.145	304.788
ARPC4-TTLL3	0.530519	0.878475	0.527191	0.259897
ARPC5	136.816	136.052	211.447	318.279
ARPC5L	39.0827	32.7877	23.3808	23.9399
ARPP19	60.6105	58.2002	76.4757	74.0418
ARPP21	0	0.0303215	0.0416922	0.0324488
ARR3	0	0	0	0
ARRB1	7.02254	6.04556	1.807	1.54875
ARRB2	21.9382	21.9821	20.9371	16.7126
ARRDC1	5.81422	6.31837	1.67747	1.88579
ARRDC2	5.60994	5.96648	1.59109	1.03848
ARRDC3	9.77924	11.6081	11.1825	15.7071
ARRDC3-AS1	0.0420791	0.0465184	0.143917	0.140778
ARRDC4	0.815436	1.33073	1.27887	0.558126
ARRDC5	0	0	0.0244255	0
ARSA	2.09088	2.26463	1.23643	0.780318
ARSB	2.89041	2.15318	1.00946	0.628737
ARSD	0.0253911	0.0392979	0.00771925	0.0377544
ARSE	0.462387	0.471848	1.36967	1.3398
ARSF	0.0510414	0.0987459	1.02802	0.284602
ARSG	0.551826	0.508783	1.19397	0.99335
ARSH	0	0.0172275	0	0
ARSI	0.565138	0.633948	0.0126331	0.0123575
ARSJ	0.202552	0.205261	0	0
ARSK	1.58159	1.49618	1.99745	1.91878
ART1	0	0	0	0
ART3	0	0	0.0258424	0.0252787
ART4	0	0.0212234	0	0
ART5	0.0701411	0.135697	0	0.0313334
ARTN	0.150143	0.0322994	0	0.043443
ARV1	17.6866	16.8945	32.5332	37.3757
ARVCF	15.6971	12.6021	7.17702	3.84962
ARX	0.0183163	0.0101243	0	0
AS3MT	8.38438	8.44103	5.03828	5.96098
ASAH1	14.6139	14.5258	13.4858	14.0357
ASAH2	0.0566448	0.137766	0.0344416	0.0336903
ASAH2B	0.161475	0.312394	0.122727	0.0600248
ASAP1	18.1737	15.6416	2.6971	1.76031
ASAP1-IT1	0	0	0.0339346	0
ASAP1-IT2	0.0259187	0.0573063	0.0590973	0.096347
ASAP2	11.0446	10.3358	1.79888	1.59141
ASAP3	6.1404	5.1101	0.174458	0.180776
ASB1	9.88029	9.1086	1.25302	1.07105
ASB10	0	0	0	0
ASB11	0	0.0105525	0	0
ASB12	0.203561	0.18003	0.123771	0.0908032
ASB13	18.8474	16.0949	28.2576	26.4205
ASB14	0.251355	0.304337	0.0181941	0.0533918
ASB15	0	0	0	0
ASB16	1.23596	0.910147	0.180929	0.0948678
ASB16-AS1	4.26146	3.71246	2.01947	1.2762
ASB17	0	0	0	0
ASB18	0	0	0	0
ASB2	0	0.0210413	0	0.0142004
ASB3	5.26733	6.29524	10.8283	8.9776
ASB4	0	0	0	0
ASB5	0	0	0	0
ASB6	11.0905	11.8078	7.71569	4.98798
ASB7	3.97174	3.70835	2.81175	1.82831
ASB8	9.25699	10.345	11.4071	7.6535
ASB9	1.56732	1.1163	0.116974	0.466225
ASB9P1	0.372536	0.393932	0.344692	0.216754
ASCC1	6.79517	7.0756	11.0163	13.1013
ASCC2	26.0049	24.9636	9.95607	6.67716
ASCC3	8.66349	8.65336	1.4591	1.52085
ASCL1	80.4236	69.1588	19.0542	18.5125
ASCL2	0.0427049	0	0	0
ASCL3	0	0	0	0
ASCL4	0	0	0	0
ASCL5	0	0	0	0
ASF1A	10.9983	10.43	21.153	22.3301
ASF1B	31.9312	26.8448	11.0481	13.588
ASGR1	0.323894	0.232314	0.159716	0.312465
ASGR2	0	0	0	0.0325537
ASH1L	13.7069	11.9535	1.59814	1.8223
ASH1L-AS1	2.53918	2.34224	6.71623	4.08031
ASH2L	18.5059	18.3131	13.9022	14.4419
ASIC1	12.1018	10.4088	2.66759	2.21625
ASIC2	0.0764685	0.120718	0	0.0145487
ASIC3	1.90373	1.42397	0.575543	0.54593
ASIC4	0.50901	0.480862	9.3129	6.42637
ASIC5	0	0	0	0
ASIP	0.225346	0.0498241	0.0685084	0.067014
ASL	7.12257	7.60961	5.50574	6.35844
ASMT	0	0	0	0
ASMTL	3.31019	3.11845	1.96229	1.13758
ASMTL-AS1	0.269467	0.321219	0	0
ASNA1	79.6194	75.562	252.212	289.944
ASNS	38.157	35.7937	36.9426	71.6002
ASNSD1	17.341	17.2276	37.0297	46.0891
ASPA	0	0	0	0
ASPDH	22.3755	18.7341	31.4608	25.366
ASPG	0	0.0295104	0	0
ASPH	12.9736	13.8886	10.2884	11.7589
ASPHD1	1.01507	0.76779	3.70854	2.43608
ASPHD2	2.89978	3.74146	2.48772	1.93732
ASPM	17.8157	12.6496	1.76825	2.06113
ASPN	0	0.0126906	0	0
ASPRV1	0.581133	0.468447	0.128823	0.144015
ASPSCR1	17.2766	15.8411	27.359	28.9372
ASRGL1	11.7882	8.18866	5.52669	4.68172
ASS1	146.751	140.909	17.7762	153.467
ASTE1	1.72205	1.59334	0.93739	1.01331
ASTL	0	0.0449032	0	0
ASTN1	0.0745283	0.112345	0.0411932	0.0201473
ASTN2	12.2314	10.3269	4.20188	6.03358
ASUN	13.1249	12.8963	9.85434	7.31173
ASXL1	19.9586	19.1911	4.49096	4.30146
ASXL2	5.72344	4.55887	0.992694	0.627357
ASXL3	1.93219	1.44306	0.0942371	0.0307272
ASZ1	0	0	0	0
ATAD1	19.1201	18.6821	10.6813	8.81015
ATAD2	18.0563	16.0809	4.01959	5.95764
ATAD2B	3.78301	3.33266	0.834904	0.69546
ATAD3A	11.8684	10.4296	2.90885	2.00243
ATAD3B	4.2407	3.46823	2.3022	2.57369
ATAD3C	0.0545643	0.0904813	0.373237	0.202831
ATAD5	3.23419	2.88083	1.27552	1.2665
ATAT1	13.2036	12.7662	11.1947	6.28544
ATCAY	11.6184	9.90902	5.59298	2.3003
ATE1	6.32692	6.21727	3.3869	2.92325
ATF1	5.863	6.23762	7.52263	11.9205
ATF2	12.9427	13.9084	14.6123	14.1204
ATF3	6.55959	7.7233	3.25852	11.5183
ATF4	226.651	252.177	460.857	459.594
ATF5	3.34499	2.88087	4.0093	3.20187
ATF6	14.088	14.8224	7.88938	6.46219
ATF6B	12.1477	14.0649	7.16156	5.27066
ATF7	10.9707	11.3915	6.33373	8.87981
ATF7IP	10.4469	10.3816	2.59229	1.2007
ATF7IP2	3.10881	2.74741	2.72719	2.63873
ATG10	3.06557	2.79471	3.12876	2.51861
ATG12	8.28316	8.42105	13.8396	17.2523
ATG13	10.4395	10.1192	3.68964	1.8037
ATG14	3.62371	4.18392	5.94693	4.75278
ATG16L1	8.13803	7.81748	9.92209	10.7338
ATG16L2	2.51548	2.49599	1.2497	0.93051
ATG2A	3.35356	2.86727	0.483396	0.26406
ATG2B	3.58323	3.12758	1.22561	0.927364
ATG3	24.4369	24.228	30.0862	29.2492
ATG4A	2.68816	2.55138	8.04564	8.94928
ATG4B	15.5952	14.6457	8.78208	8.10265
ATG4C	3.5703	3.21751	2.93069	3.40648
ATG4D	22.6501	23.0377	17.7194	12.0717
ATG5	5.23326	5.30998	8.17691	11.2921
ATG7	4.76387	4.75118	8.02423	9.69857
ATG9A	15.8665	17.1731	2.82277	1.09198
ATG9B	0.489213	0.573433	1.40547	0.958048
ATHL1	0.829562	1.24652	0.097941	0.0718534
ATIC	49.6982	46.0753	38.7418	27.9061
ATL1	14.6337	17.8179	14.2178	16.8545
ATL2	17.4855	16.6236	21.4471	26.3046
ATL3	7.08179	6.44886	5.65729	6.66148
ATM	2.60862	2.26634	1.72245	1.67595
ATMIN	7.32386	7.91116	4.29195	3.58708
ATN1	72.336	67.6973	6.52713	3.12442
ATOH1	0.197712	0.109286	0	0.0367476
ATOH7	0.121292	0.1724	1.05356	0.69564
ATOH8	2.38828	1.97026	0.102359	0.100127
ATOX1	73.0945	77.1762	122.808	141.338
ATP10A	0.583335	0.572606	0	0.0074773
ATP10B	0	0	0	0
ATP10D	7.51841	6.85896	1.36213	1.37425
ATP11A	3.48236	3.87377	0.291621	0.258517
ATP11B	9.48903	8.77291	2.88042	2.88709
ATP11C	16.8184	13.9401	5.1807	5.34177
ATP12A	0	0	0	0
ATP13A1	21.634	20.3244	7.19622	4.02098
ATP13A2	15.375	14.681	2.06197	1.09822
ATP13A3	21.0621	19.1388	10.8266	9.50099
ATP13A4	0.0184748	0.0272319	0.009361	0
ATP13A5	0.0143946	0.0318264	0	0.0107017
ATP1A1	247.48	257.692	54.9406	47.2997
ATP1A1OS	0.987943	0.562447	3.95263	2.71852
ATP1A2	0	0	0	0
ATP1A3	27.998	24.9494	33.6666	11.7215
ATP1A4	0	0	0	0
ATP1B1	54.5493	61.0732	236.68	156.935
ATP1B2	1.40608	1.20511	0.19212	0.0352366
ATP1B3	43.0957	42.2719	44.6726	53.3502
ATP1B4	0	0	0	0
ATP2A1	0.563951	0.524258	0.0684126	0.0223068
ATP2A2	74.2343	60.063	11.5159	7.46254
ATP2A3	0.905114	1.74113	0.0094365	0.0328424
ATP2B1	12.3764	10.3105	3.68635	4.63199
ATP2B2	0.0623142	0.0196824	0.143233	0.052946
ATP2B3	3.14649	3.6247	0.0929567	0.202705
ATP2B4	7.78993	8.59367	0.324162	0.284963
ATP2C1	16.0627	16.6428	11.6998	10.5177
ATP2C2	0	0	0	0
ATP4A	0.0295819	0.0163514	0	0
ATP4B	0.0527464	0.0777482	0	0
ATP5A1	139.643	149.651	386.828	347.142
ATP5B	567.725	574.509	600.915	485.518
ATP5C1	174.253	182.131	613.545	615.083
ATP5D	82.4791	76.3259	171.81	141.428
ATP5E	514.425	533.567	858.46	1297.71
ATP5EP2	0.071523	0.0790687	0.10872	0
ATP5F1	84.937	92.7623	228.932	301.205
ATP5G1	78.966	80.5886	309.357	360.811
ATP5G2	249.687	269.993	811.095	629.935
ATP5G3	75.4376	77.6417	174.223	212.542
ATP5H	185.845	183.634	347.485	414.871
ATP5I	213.671	203.899	540.742	692.228
ATP5J	69.4752	68.639	132.145	172.298
ATP5J2	234.046	211.905	750.059	1239.61
ATP5J2-PTCD1	0.912848	0.830676	0.9422	1.4026
ATP5L	47.1918	47.1053	132.917	206.063
ATP5L2	0	0	0	0.0489814
ATP5O	126.639	131.804	267.206	319.693
ATP5S	2.66188	2.19	7.2923	7.10621
ATP5SL	18.2052	18.5839	26.8782	20.7693
ATP6AP1	58.4816	61.1597	30.9974	18.7481
ATP6AP1L	0.763918	0.882899	0.633386	0.413047
ATP6AP2	52.3953	56.2652	64.7295	65.1437
ATP6V0A1	16.5116	14.478	5.54691	2.33657
ATP6V0A2	7.87079	6.80167	7.23598	7.43713
ATP6V0A4	0	0.0475511	0.0130766	0.0255827
ATP6V0B	111.165	106.947	396.086	584.404
ATP6V0C	173.154	164.204	207.004	190.814
ATP6V0CP3	0	0	0	0
ATP6V0D1	32.5932	31.101	25.9938	21.7241
ATP6V0D2	0	0	0.0168814	0
ATP6V0E1	36.1384	39.4562	45.4069	62.5646
ATP6V0E2	36.034	34.4565	37.3666	27.1284
ATP6V0E2-AS1	1.56335	1.46356	0.522717	0.318951
ATP6V1A	17.0255	18.1248	19.8346	17.8852
ATP6V1B1	1.54746	1.60568	0.825351	0.524776
ATP6V1B2	31.0329	30.4546	23.9081	19.2338
ATP6V1C1	5.38499	5.02469	3.33875	3.23162
ATP6V1C2	0.553091	0.58954	1.59327	1.99306
ATP6V1D	15.7981	16.8526	11.5862	10.7484
ATP6V1E1	91.3665	91.7545	147.319	158.128
ATP6V1E2	0.691594	0.676339	0.768235	0.375739
ATP6V1F	88.6668	94.6109	292.724	308.965
ATP6V1G1	79.0267	82.1985	229.871	266.179
ATP6V1G2	2.40534	2.33722	6.82608	3.54222
ATP6V1G2-DDX39B	3.0513	3.34591	3.65788	2.26794
ATP6V1G3	0.0415587	0.0459432	0	0
ATP6V1H	16.3094	18.279	26.1155	22.2423
ATP7A	5.85631	5.80463	1.28538	1.58311
ATP7B	4.17519	4.04426	0.442129	0.358767
ATP8A1	8.35395	7.44054	9.71825	8.36673
ATP8A2	0.168249	0.104625	0.0159844	0.0156357
ATP8B1	0.00886659	0.034307	0	0
ATP8B2	24.9343	22.972	5.68155	3.46253
ATP8B3	0.0723152	0.0285547	0	0
ATP8B4	0.00471957	0	0	0
ATP8B5P	0.00923525	0	0.0159081	0
ATP9A	33.3555	28.8362	3.49946	2.39051
ATP9B	1.97539	1.93002	0.973363	0.52996
ATPAF1	13.2558	11.4225	9.88572	8.62692
ATPAF2	5.59649	6.65563	7.06343	7.84236
ATPIF1	38.8151	32.6805	75.1733	80.0955
ATR	2.26488	1.7562	0.89706	0.735197
ATRAID	67.7879	70.1893	177.697	201.315
ATRIP	8.75842	8.42027	4.98817	4.33543
ATRN	13.4124	11.6287	1.56139	1.13061
ATRNL1	5.26439	5.55725	0.464448	0.824368
ATRX	11.3877	9.9569	4.05856	4.59931
ATXN1	1.93634	1.72643	0.45695	0.671988
ATXN10	62.7532	64.3348	55.2694	55.7377
ATXN1L	11.4414	11.1135	0.725497	0.441684
ATXN2	12.5053	11.9248	1.85494	1.22353
ATXN2L	56.8054	55.1604	10.4007	5.88401
ATXN3	1.89069	1.99028	2.23389	1.3507
ATXN3L	0	0	0	0
ATXN7	1.79754	1.68804	0.201148	0.127817
ATXN7L1	1.42424	1.3121	1.16551	1.51467
ATXN7L2	4.95028	4.88619	3.42645	1.82373
ATXN7L3	39.1552	35.3093	9.94503	5.35621
ATXN7L3B	31.789	32.9142	24.0358	16.7301
ATXN8OS	0	0	0	0
AUH	3.79558	4.54416	5.89552	5.49582
AUNIP	3.37147	3.20479	2.07712	3.00025
AUP1	96.6749	103.589	120.036	133.995
AURKA	27.0168	21.4795	11.7656	13.3175
AURKAIP1	50.7504	45.3729	68.0852	69.8096
AURKAPS1	0.239744	0.511143	0.416488	0.331015
AURKB	64.0733	54.6213	34.8057	44.9281
AURKC	0.23682	0.209443	0.179991	0.105639
AUTS2	20.4876	16.8887	5.32865	2.97878
AVEN	7.04859	6.34781	5.27877	4.88244
AVIL	0.149608	0.223664	0.200558	0.091725
AVL9	9.89954	9.84336	4.64192	3.70904
AVP	0	0	0	0
AVPI1	2.96862	3.09368	1.69578	0.787222
AVPR1A	0	0	0	0
AVPR1B	0	0.0164113	0	0
AVPR2	0.140075	0.198772	0	0
AWAT1	0	0	0	0
AWAT2	0	0	0	0
AXDND1	0.00778527	0	0	0.011576
AXIN1	14.8043	13.8388	3.23949	1.46998
AXIN2	3.66322	3.63028	1.86242	1.01724
AXL	0.00638653	0.0141206	0.00970796	0.00949619
AZGP1	0	0.0230018	0	0.0309377
AZGP1P1	0	0	0	0
AZI1	11.5201	9.82637	0.497749	0.354729
AZI2	14.4952	15.32	24.3785	24.0889
AZIN1	39.704	42.718	68.0943	86.2504
AZU1	0.0577203	0.0319049	0	0
B2M	280.672	292.801	302.884	405.755
B3GALNT1	0.00808068	0	0.0122832	0
B3GALNT2	19.2319	17.8482	13.2141	11.5875
B3GALT1	0.27923	0.335531	1.53171	0.704018
B3GALT2	0.00741839	0.0246031	0.687864	0.386067
B3GALT4	0.187334	0.18984	0.237301	0.162487
B3GALT5	0.499873	0.386936	0.0303241	0.0296626
B3GALT6	10.3132	9.19191	3.05225	1.93438
B3GALTL	3.00502	3.39111	0.417847	0.715282
B3GAT1	0.00743073	0.0164293	0	0
B3GAT2	2.08143	2.67809	1.37117	1.06343
B3GAT3	11.452	9.20261	19.0414	15.001
B3GNT1	18.1064	18.0206	29.8424	30.2691
B3GNT2	6.22346	6.29788	9.5183	12.2007
B3GNT3	0	0	0	0
B3GNT4	0.507509	0.773864	0	0
B3GNT5	0.472402	0.374037	0.0970383	0.0854294
B3GNT6	0	0	0	0
B3GNT7	0.0580865	0.112376	0.0772586	0.0647771
B3GNT8	0.126406	0.093161	0.0853979	0.0417675
B3GNT9	2.79743	2.33541	0.31727	0.458522
B3GNTL1	1.37026	1.95665	1.67789	1.33001
B4GALNT1	26.3149	23.5271	5.03437	3.95146
B4GALNT2	0	0	0	0
B4GALNT3	1.36272	0.930978	0.186196	0.0569171
B4GALNT4	25.8404	26.9744	7.85351	4.48695
B4GALT1	9.50896	8.39171	1.46734	1.29553
B4GALT2	29.852	25.2789	27.8358	17.8751
B4GALT3	48.6635	50.5671	69.1205	55.0242
B4GALT4	3.22577	3.63071	1.25075	0.790778
B4GALT5	45.1184	38.8415	14.2194	12.1374
B4GALT6	1.18098	1.08797	2.56808	2.42264
B4GALT7	3.81014	3.92569	3.26651	2.51541
B9D1	3.5616	4.42101	18.2794	19.4487
B9D2	3.29241	3.47135	6.79103	7.13637
BAALC	0.0925675	0.0510662	0.0421294	0.0582001
BAAT	0.0151354	0.0342742	0.0589089	0
BABAM1	43.7303	44.3412	72.592	71.0827
BACE1	6.81889	6.09035	2.28317	1.80625
BACE1-AS	1.06257	1.24285	0.150787	0.049166
BACE2	0.531301	0.72014	0.00454804	0.00444883
BACH1	4.11778	4.52728	2.1655	1.6108
BACH2	1.52186	1.17672	0.118097	0.124078
BAD	38.435	38.2932	56.3463	62.0511
BAG1	25.362	21.6201	28.7357	31.1412
BAG2	6.6699	6.09738	3.08061	5.77888
BAG3	11.7822	12.7194	3.03688	3.93037
BAG4	4.61881	5.07981	14.483	17.5221
BAG5	15.0977	13.9863	6.2897	4.97687
BAG6	73.8301	73.9194	26.7109	15.6874
BAGE	0	0	0	0
BAGE2	0.0278376	0.00769362	0	0
BAGE3	0.0278376	0.00769362	0	0
BAGE4	4.39801e-31	0	0	0
BAGE5	4.52508e-31	0	0	0
BAHCC1	0.0465529	0.0457459	0.0707635	0.0076911
BAHD1	19.3071	17.3002	4.05746	3.09561
BAI1	2.32351	2.04228	1.20142	0.75752
BAI2	29.7229	27.5658	4.73605	2.8259
BAI3	0.177431	0.397462	0.787828	0.694273
BAIAP2	4.88481	4.00193	8.53166	3.79306
BAIAP2-AS1	4.08411	3.85024	0.117647	0.00885233
BAIAP2L1	0.0514604	0.0713557	0.0218032	0.0106638
BAIAP2L2	0.220871	0.162782	0.223826	0.0182453
BAIAP3	0.188923	0.751599	0.00895992	0
BAK1	11.546	10.19	9.96117	10.3507
BAMBI	13.7862	20.439	2.15825	2.06577
BANCR	0	0	0	0
BANF1	73.8639	74.5729	162.21	212.403
BANF2	0	0	0	0
BANK1	0.017217	0.00951667	0.0130855	0
BANP	5.69453	4.76402	3.72509	2.90285
BAP1	37.1018	34.5771	9.62116	5.32954
BARD1	5.40818	5.26084	2.40609	4.01319
BARHL1	0	0	8.55985	2.46269
BARHL2	0.0175939	0.0194501	0	0
BARX1	0.159841	0.667549	0	0.0264077
BARX2	0	0	0	0
BASP1	0	0	0.0466755	0.103651
BASP1P1	0	0	0	0
BATF	0	0	0	0
BATF2	0.0245986	0.0271937	0	0
BATF3	2.41472	1.39406	0.0815676	0.598412
BAX	66.5297	72.0938	74.7536	82.7744
BAZ1A	16.8394	14.4057	5.51199	5.94412
BAZ1B	44.6695	36.7487	6.23524	6.11843
BAZ2A	19.122	17.5599	1.52467	1.22601
BAZ2B	3.60311	2.99011	0.908735	0.836058
BBC3	4.41317	6.82182	7.76453	2.95757
BBIP1	4.04518	3.65293	6.98138	7.30414
BBOX1	0	0	0	0
BBS1	3.77234	4.10988	1.87579	0.870983
BBS10	2.66657	3.22401	10.8313	10.322
BBS12	0.665062	0.735226	2.01018	1.78513
BBS2	11.9162	12.8425	13.6207	10.7228
BBS4	4.29142	4.56841	10.6207	11.9567
BBS5	1.93422	2.08299	1.44473	0.681815
BBS7	5.45659	4.92929	4.75408	5.11621
BBS9	2.63304	2.90912	2.47349	1.9001
BBX	7.41807	7.51927	3.78966	3.18383
BCAM	0.225328	0.347908	0.0163102	0
BCAN	0.00920928	0.020362	0.0115299	0.0112784
BCAP29	6.78744	5.94469	6.29603	9.41534
BCAP31	100.212	105.393	88.511	90.1101
BCAR1	21.7746	20.349	7.20721	4.64355
BCAR3	4.22126	4.97662	0.446463	0.817602
BCAR4	0.0402146	0	0	0
BCAS1	0.0227227	0.00837332	0	0.0112622
BCAS2	38.8232	37.9316	42.2538	53.455
BCAS3	2.87024	3.32453	1.06563	0.576788
BCAS4	8.57811	9.11136	12.217	14.403
BCAT1	30.1429	29.6355	12.3619	10.3606
BCAT2	13.26	13.9641	9.70018	7.41756
BCCIP	36.7411	33.356	31.6813	32.3714
BCDIN3D	3.09558	3.04656	8.50968	9.38795
BCDIN3D-AS1	0.698577	0.762402	0.786697	0.530987
BCHE	0.129075	0.107019	0.0490505	0.0479806
BCKDHA	17.5678	19.782	21.72	16.4587
BCKDHB	4.63453	4.44387	6.18062	6.00884
BCKDK	23.4065	29.567	13.0031	9.82843
BCL10	7.06199	7.2087	7.46182	5.11664
BCL11A	14.2768	12.4111	20.0316	12.6406
BCL11B	0.0033433	0.0144736	0.00497531	0
BCL2	9.12009	10.6173	2.10311	1.79243
BCL2A1	0	0	0	0
BCL2L1	27.7821	27.8636	31.9877	25.0909
BCL2L10	0	0.0656083	0	0
BCL2L11	12.404	15.6693	1.93882	1.69158
BCL2L12	9.73469	9.68813	5.28702	6.07718
BCL2L13	11.6141	10.928	10.2701	8.24021
BCL2L14	0.0418144	0.0308172	0	0
BCL2L15	0.227585	0.193085	0.386171	0.440705
BCL2L2	12.9284	12.8497	2.04342	1.27234
BCL2L2-PABPN1	27.7183	29.4312	23.3641	17.483
BCL3	2.68288	2.82543	0.558064	0.25195
BCL6	2.30804	2.8851	0.329645	0.241365
BCL6B	0.037334	0.0247636	0.01135	0
BCL7A	22.0275	21.1423	11.5303	6.2067
BCL7B	23.0411	21.1185	44.2368	53.2521
BCL7C	36.229	37.0329	50.0344	58.613
BCL9	19.1155	17.6595	1.5055	0.891182
BCL9L	3.84364	3.33539	0.263693	0.0758649
BCLAF1	27.0324	25.6634	9.04405	7.73812
BCMO1	0.0108449	0	0	0
BCO2	0.0387452	0.0647977	0.0306118	0.0150368
BCOR	20.3504	18.7256	1.90271	1.18248
BCORL1	1.11161	0.963513	0.0673645	0.0274563
BCORP1	0	0	0	0
BCR	11.3823	9.88983	0.947252	0.717544
BCRP2	0	0	0	0.0167679
BCRP3	0.516355	0.384018	0.140382	0.0823919
BCS1L	11.9942	11.3403	19.745	17.7045
BCYRN1	0.137803	0	0	0
BDH1	3.40065	3.10026	2.83631	3.09622
BDH2	7.35531	7.70281	8.85128	8.24272
BDKRB1	1.07224	1.14063	0.399781	0.240653
BDKRB2	0.332377	0.388241	0.0381309	0.0652736
BDNF	4.97001	6.39109	0.837736	0.800982
BDNF-AS	0.829104	0.884511	1.60326	1.13195
BDP1	3.73358	3.43387	1.65816	2.30753
BEAN1	0.0228114	0	0	0
BECN1	11.8208	11.7901	5.12185	2.77592
BEGAIN	11.0734	10.0636	1.99222	1.27978
BEND2	0	0	0.0086375	0
BEND3	2.71504	2.19322	0.486595	0.340825
BEND3P3	1.01814	0.865054	0.0946156	0.105773
BEND4	2.92438	3.02182	0.827158	0.674578
BEND5	0.0198196	0.0876424	0.0903815	0.05894
BEND6	0.760933	0.496099	0.963891	0.986382
BEND7	6.33594	5.1606	2.55547	1.39779
BEST1	0.257005	0.133568	0.115312	0.140298
BEST2	0	0	0.0209471	0
BEST3	0	0	0	0
BEST4	0.0502299	0.0555292	0.0190882	0
BET1	2.88915	3.20346	6.09087	6.54613
BET1L	15.787	17.6669	11.1326	5.67448
BEX1	65.4042	52.5574	211.555	208.302
BEX2	1.79401	1.75051	25.4529	22.0959
BEX4	4.47375	4.6055	7.34999	4.33084
BEX5	0	0.0707804	0	0.0476002
BFAR	21.1221	22.0787	35.2494	33.9789
BFSP1	0.369906	0.251104	0.090682	0.0532224
BFSP2	0	0	0	0
BGLAP	0.195303	1.95976e-18	0.136448	0.281609
BGN	3.22006	5.92899	0.0327405	0.096079
BHLHA15	0.149124	0.0824286	0	0
BHLHA9	0	0	0	0
BHLHB9	2.29005	2.12861	2.47295	2.25849
BHLHE22	0.100726	0.0428279	0.105999	0.0460832
BHLHE23	0	0	0	0
BHLHE40	14.0017	27.5532	0.171429	0.219286
BHLHE40-AS1	0	0	0	0
BHLHE41	0.0348154	0.0307908	0.0105844	0
BHMT	0.0210564	0	0	0
BHMT2	0	0	0	0
BICC1	1.89028	2.54683	0.371997	0.439168
BICD1	10.5353	9.11436	1.55034	1.27651
BICD2	15.4846	13.4977	1.73445	1.50621
BID	24.9296	20.7201	42.4867	44.8424
BIK	0.0828556	0	0	0
BIN1	24.0491	20.311	6.42872	6.83236
BIN2	0	0	0	0
BIN3	5.91391	5.84466	3.6608	3.64452
BIN3-IT1	0.0286248	0.0316447	0.0217558	0
BIRC2	7.87101	8.2735	9.66979	11.1667
BIRC3	0.0060479	0.012629	0.121555	0.0899269
BIRC5	75.1854	64.869	128.167	229.828
BIRC6	6.02947	5.47775	1.13387	1.07673
BIRC7	0	0	0.0303015	0
BIRC8	0	0	0	0
BIVM	12.7858	12.2897	25.0713	24.0837
BIVM-ERCC5	4.85982	4.09744	2.74419	1.93222
BLACAT1	0	0.0111228	0.0305878	0.0299206
BLACE	0	0	0	0
BLCAP	10.3647	10.9557	6.33298	3.43612
BLID	0	0	0	0
BLK	0	0.0112345	0	0
BLM	7.52179	6.0855	0.733379	0.60502
BLMH	23.1458	22.124	13.0262	8.0216
BLNK	0	0	0	0
BLOC1S1	56.3976	50.6875	160.673	229.521
BLOC1S1-RDH5	0.595146	0.597595	1.37972	1.17423
BLOC1S2	7.59797	7.42466	10.0209	14.2382
BLOC1S3	3.12809	2.87615	1.01561	0.556938
BLOC1S4	13.3816	12.8924	13.7935	9.69544
BLOC1S5	2.36882	3.00242	5.53706	6.05171
BLOC1S5-TXNDC5	2.80912	3.60335	4.12319	3.8856
BLOC1S6	17.6182	18.7091	30.3442	39.5433
BLVRA	44.6479	44.6876	39.9424	41.303
BLVRB	1.75265	2.82135	0.888048	0.502918
BLZF1	6.11417	5.82951	7.03092	10.2741
BMF	7.652	10.7428	4.29775	1.46449
BMI1	15.8937	12.559	20.2957	19.0632
BMP1	5.81109	5.0764	0.969525	0.610057
BMP10	0	0	0	0
BMP15	0	0	0	0
BMP2	3.04983	2.73422	0.889087	0.733027
BMP2K	3.50333	3.39939	0.960112	0.776737
BMP3	0.0321317	0.010149	0.19537	0.12968
BMP4	2.22568	1.43639	0	0
BMP5	0	0	0	0.0180351
BMP6	0	0	0	0
BMP7	56.1473	49.6552	4.87332	5.88353
BMP8A	0.116959	0.0879228	0.0213343	0.0139126
BMP8B	0.153472	0.200511	0	0
BMPER	0.0366216	0.0809704	0.0159049	0
BMPR1A	12.8254	12.9715	7.04803	6.07173
BMPR1B	4.97228	4.24938	6.88413	4.76895
BMPR2	6.24321	6.4607	2.55235	2.24376
BMS1	11.7834	9.68945	1.30248	1.37618
BMS1P1	0.0341905	0.048106	0.033073	0.013865
BMS1P2	0	0	0	0
BMS1P4	0.711727	1.09857	0.469492	0.559088
BMS1P5	0.0341905	0.048106	0.033073	0.013865
BMS1P6	0	0	0	0
BMX	0.35299	0.378753	0	0.0308744
BNC1	0.00570695	0.00630904	0	0.00848573
BNC2	2.34779	2.28483	1.15142	0.965839
BNIP1	3.87528	4.80136	19.7285	23.3465
BNIP2	16.9405	17.93	7.85236	5.70639
BNIP3	69.9706	124.014	54.8231	60.9238
BNIP3L	18.0634	32.1483	15.0319	13.4405
BNIPL	0.219235	0.215601	0.296453	0.2003
BOC	2.19525	2.92724	0.590813	0.278236
BOD1	17.2259	19.131	55.3025	75.589
BOD1L1	7.1656	6.7982	1.39663	1.18426
BOD1L2	0	0.00869354	0	0
BOK	0.646328	1.24216	0.0151148	0.0295702
BOK-AS1	0	0	0	0
BOLA1	13.5441	13.547	54.1077	50.7355
BOLA2	0	0	0	0
BOLA2B	0	0	0	0
BOLA3	31.0981	28.6397	61.8749	85.5199
BOLA3-AS1	7.31088	7.38341	11.9673	10.8466
BOLL	0.0282968	0.0104274	0.0143377	0.0420748
BOP1	5.568	5.5546	1.82089	0.989537
BORA	8.04447	7.38239	5.44136	5.12196
BPESC1	0	0	0	0
BPGM	9.82957	9.19164	14.0175	12.863
BPHL	17.1525	15.9286	30.497	39.2183
BPI	0	0	0	0
BPIFA1	0	0	0	0
BPIFA2	0	0	0	0
BPIFA3	0	0	0	0
BPIFA4P	0	0	0	0
BPIFB1	0	0	0	0
BPIFB2	0.0411257	0	0	0
BPIFB3	0	0	0	0
BPIFB4	0	0	0	0
BPIFB6	0	0	0	0
BPIFC	0	0.0146956	0	0
BPNT1	15.7752	16.5409	45.0649	44.2886
BPTF	14.5774	12.0407	0.958444	0.93329
BPY2	0	0	0	0
BPY2B	0	0	0	0
BPY2C	0	0	0	0
BRAF	4.19019	4.30632	1.98279	1.14247
BRAP	10.1922	10.8771	4.05455	2.89682
BRAT1	17.7333	15.384	7.17053	4.48124
BRCA1	9.69313	7.74501	2.27339	3.50892
BRCA2	3.82347	2.94142	0.576274	0.536206
BRCC3	7.01721	6.5643	3.45866	2.76892
BRD1	16.9587	14.094	2.27481	1.41835
BRD2	55.4619	59.7002	28.8654	23.1209
BRD3	32.7063	27.7478	7.10349	3.76882
BRD4	23.2079	20.9891	1.86043	1.06596
BRD7	35.7843	32.61	9.99197	7.35353
BRD7P3	0.0320851	0.0354701	0	0
BRD8	17.6764	15.9267	15.6661	12.9527
BRD9	18.4246	18.2744	5.7883	4.0291
BRDT	0	0	0.0263269	0
BRE	29.6313	30.0919	51.0682	55.8666
BRE-AS1	2.31863	2.47567	11.6947	8.7271
BREA2	0.420287	0.464627	0.119787	0.0390581
BRF1	9.47599	9.59198	3.57125	3.12154
BRF2	5.50098	6.32866	12.0427	11.0947
BRI3	54.3603	69.1934	95.1918	71.0487
BRI3BP	15.0639	11.1631	5.12693	8.67642
BRICD5	3.84475	3.80798	3.02869	4.41623
BRINP1	0	0	0	0.0244907
BRINP2	0	0	0.0112448	0
BRIP1	7.8291	6.24989	1.98918	2.44901
BRIX1	42.4477	40.6402	45.9804	66.8973
BRK1	101.41	110.129	211.68	224.733
BRMS1	36.4143	36.0536	33.7448	29.5878
BRMS1L	4.01326	3.5696	5.37271	5.96736
BROX	9.80167	9.57216	8.09222	6.61194
BRPF1	9.86574	9.73678	1.39917	0.944931
BRPF3	5.77276	4.49769	0.504844	0.23392
BRS3	0	0	0.0283149	0
BRSK1	14.7876	12.4284	4.48006	1.94347
BRSK2	0.492247	0.443516	1.93585	0.782016
BRWD1	6.86722	8.0105	6.41661	4.82081
BRWD1-AS1	0	0	0	0
BRWD1-IT2	0.230432	0.141524	0.194596	0.152281
BRWD3	2.25287	2.22898	0.522277	0.41299
BSCL2	23.5058	19.7465	16.263	10.0176
BSDC1	15.041	14.1711	7.12013	4.00226
BSG	278.342	270.534	306.694	308.117
BSN	1.81253	1.08483	0.145405	0.0956395
BSN-AS2	0.0404464	0.0558918	0.215184	0.0601401
BSND	0	0	0	0
BSPH1	0	0	0	0
BSPRY	0	0	0	0.0166679
BST1	0.746932	0.62913	1.24352	1.34861
BST2	20.1258	27.7958	0.766944	0.666857
BSX	0	0	0	0
BTAF1	7.52441	7.32186	2.71728	2.20204
BTBD1	18.9503	18.2953	12.981	9.06777
BTBD10	8.51452	8.46108	8.60183	10.7558
BTBD11	0.958334	0.940066	0.184656	0.160559
BTBD16	0	0	0	0
BTBD17	0	0	0.953728	0.0932924
BTBD18	0.0777179	0.0572781	0.0262526	0.01284
BTBD19	0.0502299	0.0555292	0	0.0497916
BTBD2	41.0993	43.1902	23.8861	11.6302
BTBD3	11.6687	12.4415	10.3377	10.2591
BTBD6	16.2003	14.8049	19.2292	17.3326
BTBD7	6.54189	5.35427	1.39467	1.0315
BTBD8	0.272845	0.0402174	0.193547	0.0811393
BTBD9	1.50341	1.43351	0.155669	0.138176
BTC	0	0	0	0.0887441
BTD	3.85365	3.15408	3.93387	4.1346
BTF3	477.532	536.872	1115.49	977.78
BTF3L4	13.5164	14.5943	52.5896	67.7637
BTF3P11	0	0	0	0
BTG1	13.5595	15.8605	18.97	13.037
BTG2	15.9515	22.5931	10.4191	5.51458
BTG3	26.4143	28.1633	36.1286	62.0198
BTG4	0	0.0287239	0	0.0386339
BTK	0.0403224	0	0.0459696	0.0749448
BTLA	0.00853389	0.00943422	0.0129721	0
BTN1A1	0.00923201	0	0.0140333	0.0137272
BTN2A1	7.5919	8.27215	4.86339	4.39142
BTN2A2	2.99338	3.94504	2.28202	2.09715
BTN2A3P	0.38161	0.574211	0.161131	0.173378
BTN3A1	2.69638	3.1256	4.41745	3.31678
BTN3A2	2.69015	2.92998	1.05703	0.711791
BTN3A3	1.79475	1.80796	1.81487	0.955639
BTNL2	0	0	0	0
BTNL3	0	0	0	0
BTNL8	0	0	0	0
BTNL9	0.00752013	0	0	0
BTRC	3.60374	3.73553	0.941615	0.778468
BUB1	17.5107	15.5227	6.22188	9.45086
BUB1B	35.1613	28.669	7.37713	9.2866
BUB3	64.0469	63.8793	96.8814	104.494
BUD13	8.53845	8.51011	8.5068	7.95412
BUD31	52.6826	49.9537	63.0238	139.144
BVES	16.0444	17.1699	3.24132	2.48415
BVES-AS1	0.445069	0.288428	0.863166	0.456398
BYSL	23.662	21.7425	22.1959	17.4834
BZRAP1	0.0381737	0.0416647	0.105503	0.0309605
BZRAP1-AS1	0.0474921	0.122634	0.197639	0.0529325
BZW1	35.0725	32.3539	25.3903	33.3242
BZW2	84.0354	91.547	316.788	353.013
C10orf10	1.9932	3.65835	6.85589	2.22278
C10orf105	0	0	0	0
C10orf107	0	0.0232406	0	0
C10orf11	0	0	0	0
C10orf111	0.138205	0.237667	0.490191	0.616497
C10orf113	0	0	0	0
C10orf115	0	0	0	0
C10orf118	0.406736	0.463554	0.210338	0.236924
C10orf12	1.45356	1.20358	0.0704227	0.0430541
C10orf120	0	0	0	0
C10orf126	0	0	0	0
C10orf128	0.0687218	0	0	0
C10orf129	0	0	0	0
C10orf131	0.0223813	0.0494852	0.102064	0
C10orf137	5.54871	5.50767	3.77575	3.6676
C10orf2	7.83548	6.84636	5.37949	4.36345
C10orf25	1.17204	1.0146	1.37017	0.779799
C10orf32	3.85032	4.18067	9.29336	8.89711
C10orf32-AS3MT	2.12507	0.988415	0.77216	1.54521
C10orf35	7.19165	6.78756	4.68506	5.52853
C10orf40	0	0	0	0
C10orf53	0.0636529	0	0.186957	0.12192
C10orf54	0.00551445	0.140213	0	0
C10orf55	0	0	0	0
C10orf62	0.021192	0.0234278	0.0322133	0
C10orf67	0	0	0	0
C10orf68	0.0677614	0.0659642	0.0763376	0.115149
C10orf71	0	0	0	0
C10orf76	4.94191	4.82471	3.03408	2.6148
C10orf82	0	0	0	0
C10orf85	0.0363041	0.0133781	0.0183949	0.0179936
C10orf88	3.62365	3.35557	6.09141	5.23591
C10orf90	0.0256368	0.0283415	0	0
C10orf91	0	0	0	0
C10orf95	0.538606	0.378526	2.40169	1.41046
C10orf99	0	0	0	0
C11orf1	6.11835	6.44582	18.1449	16.5974
C11orf16	0.0273459	0.0151155	0	0
C11orf21	0	0	0	0
C11orf24	11.1067	10.8111	7.21378	6.16274
C11orf30	5.9461	5.14258	1.57538	1.69015
C11orf31	32.2192	32.83	124.85	151.706
C11orf34	0	0.0188821	0	0
C11orf35	0.125455	0.221905	0.01907	0
C11orf40	0	0	0	0
C11orf42	0.0690826	0.0763708	0	0
C11orf44	0	0	0	0
C11orf45	0.0586811	0.00810899	0.02208	0
C11orf48	17.3807	15.9292	33.5832	45.0538
C11orf49	16.0143	16.8488	11.841	10.0001
C11orf52	0	0	0	0
C11orf53	0	0	0	0
C11orf54	3.65623	3.71325	19.4185	20.7143
C11orf57	7.74817	8.24842	14.0034	10.6768
C11orf58	35.4665	35.5162	73.7048	84.6049
C11orf63	0	0	0	0
C11orf65	0.0254796	0.0281677	0.193654	0.151544
C11orf68	11.1807	13.0521	13.6537	8.67987
C11orf70	0.877351	1.52254	4.97415	6.05972
C11orf71	2.47628	2.2072	6.66525	4.3372
C11orf73	21.1156	21.0354	41.6141	45.6616
C11orf74	9.78187	10.0406	8.41608	9.73966
C11orf80	6.64392	6.30778	4.81122	4.76487
C11orf82	10.6892	9.66098	7.42236	11.5992
C11orf83	8.83203	9.30171	19.6557	30.8354
C11orf84	39.4606	34.7357	24.4215	19.6379
C11orf85	0	0	0	0
C11orf86	0	0	0	0
C11orf87	0	0	0	0
C11orf88	0	0	0	0
C11orf91	0.0291478	0.0644458	0	0
C11orf92	0	0	0	0
C11orf93	0	0	0	0
C11orf94	0	0	0	0
C11orf95	23.8544	21.2417	8.03475	4.72551
C11orf96	19.3043	17.1779	29.2535	20.9826
C12orf10	33.6425	37.0481	84.7267	72.1201
C12orf23	13.3204	14.7084	19.7372	27.7519
C12orf29	4.49634	4.38562	24.5126	32.4168
C12orf36	0	0	0	0
C12orf39	0	0	0.137252	0
C12orf4	7.05739	7.32956	18.3963	21.1514
C12orf40	0	0	0	0
C12orf42	0.0570824	0.0483112	0.0187659	0.0565843
C12orf43	7.40263	6.66813	9.41876	9.31522
C12orf44	17.5556	17.2579	19.1045	19.5335
C12orf45	16.5032	15.5778	23.6065	22.8399
C12orf49	13.4495	11.2614	5.69496	4.0476
C12orf5	2.61445	2.73461	2.33973	2.65507
C12orf50	0.0154372	0	0	0
C12orf52	12.3224	13.4093	11.2025	8.59893
C12orf54	0	0	0	0
C12orf56	0.0331283	0.0366234	0.327322	0.369441
C12orf57	127.337	127.428	799.441	819.481
C12orf60	1.05188	0.749397	2.94915	3.12811
C12orf61	0.406373	0.276459	0.332616	0.16268
C12orf65	12.3838	10.8115	10.6681	10.6215
C12orf66	4.43399	3.9729	7.971	7.05956
C12orf68	2.30192	3.83578	0.392579	0.350623
C12orf71	0	0	0	0
C12orf73	5.02157	5.05292	13.0448	11.7663
C12orf74	0	0	0	0
C12orf75	17.168	14.783	12.4772	14.2678
C12orf76	4.30108	3.87266	18.8942	12.1471
C12orf77	0.174423	0.115695	0	0
C12orf79	0.122961	0.081019	0.0560745	0.127133
C12orf80	0	0	0	0
C13orf35	0	0	0	0
C13orf45	0	0	0	0
C14orf1	16.681	15.3611	20.6799	16.8489
C14orf105	0	0	0	0
C14orf119	12.2904	12.2896	30.566	38.6039
C14orf132	21.5583	21.7299	9.7028	5.38813
C14orf142	5.08057	5.12172	25.6179	40.3675
C14orf159	5.84605	5.93162	4.86509	3.53722
C14orf166	93.0858	94.9053	106.056	113.163
C14orf166B	0	0	0	0
C14orf169	0.0106907	0.0118186	0	0
C14orf177	0	0	0	0
C14orf178	0	0	0	0.184747
C14orf180	0.0142504	0.0157538	0	0
C14orf182	0	0	0	0.0291409
C14orf183	0	0	0	0
C14orf2	97.7197	95.9207	322.374	370.645
C14orf23	0	0	0	0
C14orf28	0.724583	0.871116	0.8949	0.808042
C14orf37	1.10167	1.35007	0.428389	0.177776
C14orf39	2.61966	3.00135	3.21461	4.32013
C14orf64	0.0180524	0	0.0274409	0.0536847
C14orf79	2.46493	2.17075	3.28115	3.10605
C14orf80	9.15778	7.43466	1.51732	1.45272
C14orf93	4.66898	4.58376	5.18366	3.71751
C15orf26	0.0167114	0	0	0
C15orf27	0.0219429	0.0242578	0.0166773	0
C15orf32	0.076247	0.0337164	0	0.0226745
C15orf37	0.915434	0.763371	1.28397	0.438461
C15orf38	6.55397	5.98846	1.5165	0.855541
C15orf38-AP3S2	3.36681	3.01013	1.7106	1.13916
C15orf39	4.91093	4.24595	0.695885	0.592303
C15orf40	8.55717	7.45478	23.1381	23.2931
C15orf41	2.65535	2.50925	1.90314	1.88445
C15orf43	0	0	0	0
C15orf48	0.188184	0.104019	0.0953507	0.326448
C15orf52	2.24813	1.76976	0.157722	0.0367338
C15orf53	0	0	0	0
C15orf54	0	0	0	0
C15orf56	0	0	0	0
C15orf57	8.26461	8.70075	26.2657	33.9699
C15orf59	0.489592	0.324746	0.0893056	0.116477
C15orf60	0.0284546	0	0	0
C15orf61	6.0265	5.0468	22.3026	22.0876
C15orf62	2.05067	1.92813	1.60678	0.974475
C15orf65	1.26002	1.04472	3.45822	3.38278
C16orf11	0.0712326	0.0262492	0	0
C16orf13	58.1419	67.5987	94.0464	83.3874
C16orf3	0.370711	0.263456	0.0402504	0
C16orf45	14.8491	13.179	16.4283	10.7178
C16orf46	0.170818	0.208628	0.213474	0.225274
C16orf47	0.402761	0.667879	0.0306112	0.0299435
C16orf52	4.76992	4.88012	7.1245	6.44927
C16orf54	0	0	0	0
C16orf58	31.4058	35.8275	25.7263	16.2638
C16orf59	19.0937	15.7283	9.97765	10.6254
C16orf62	10.274	10.5136	5.6407	4.1106
C16orf70	8.72255	8.44847	5.76755	4.26087
C16orf71	0.136174	0.086023	0.133067	0.101239
C16orf72	13.997	15.8101	6.96812	6.20631
C16orf74	0	0	0	0
[truncated: 21,954 more rows]
